# Supplementary material
Source: PubMed Central journal article supplement (PMC2491561)
Supplement: NIHMS56766-supplement-SI.pdf [file NIHMS56766-supplement-SI.pdf]

# Supporting Information for

## Spectral Tuning in Visual Pigments: An ONIOM(QM:MM) Study on Bovine Rhodopsin and its Mutants

Ahmet Altun,<sup>a,b</sup> Shozo Yokoyama,<sup>b</sup> Keiji Morokuma<sup>a,c</sup>

<sup>a</sup> *Cherry L. Emerson Center for Scientific Computation and Department of Chemistry, Emory University, Atlanta, GA 30322, USA*

<sup>b</sup> *Department of Biology, Rollins Research Center, Emory University, 1510 Clifton Road, Atlanta, GA 30322, USA*

<sup>c</sup> *Fukui Institute for Fundamental Chemistry, Kyoto University, 34-4 Takano Nishihiraki-cho, Sakyo, Kyoto 606-8103, Japan*

### Contents

1. Abbreviations
2. AMBER Charges and Parameters for 11-*cis*-retinal and Attached Lys296
3. Vertical Excitation Energies and Oscillator Strengths
4. Geometry Parameters of 11-*cis*-retinal
5. Average BLA Values

### 1. Abbreviations

**WT:** Wild Type Enzyme

**PSB(R):** Protonated Schiff-Base (Retinal)

**SB(R):** Deprotonated Schiff-Base (Retinal)

**B3LYP(ME//ME):** TD-B3LYP:AMBER-ME calculations on B3LYP:AMBER-ME geometries

**B3LYP(EE//ME):** TD-B3LYP:AMBER-EE calculations on B3LYP:AMBER-ME geometries

**B3LYP(ME//EE):** TD-B3LYP:AMBER-EE calculations on B3LYP:AMBER-EE geometries

## 2. AMBER Charges and Parameters for 11-*cis*-retinal and Attached Lys296

AMBER force field is derived for RESP charges calculated at the HF/6-31G\* level. Hence, we calculated RESP charges for the model part (both for SBR and PSBR, see Figure 2 of the paper for the model part and indexing of its atoms) at the same level by fitting point charges of all protein atoms to the electrostatic potential. We used the resulting RESP charges shown in Table 2.1 in our pure AMBER and hybrid ONIOM(QM:AMBER) calculations with a modification for the Schiff-base terminal due to excess link atom for force-field calculations (see footnote of Table 2.1). The RESP charges of hydrogen atoms attached the same C atom were averaged.

**Table 2.1.** RESP charges of model part for both PSBR and SBR calculated at HF/6-31G\* level along with atom types

| Atom Index | Atom Type | PSBR     | SBR      | Atom Index                    | Atom Type | PSBR     | SBR      |
|------------|-----------|----------|----------|-------------------------------|-----------|----------|----------|
| C6         | CM        | 0.00449  | -0.01483 | C8                            | CA        | -0.05066 | -0.06693 |
| C1         | CT        | 0.00256  | -0.00649 | H                             | HA        | 0.10702  | 0.12494  |
| C16        | CT        | 0.00154  | -0.00234 | C9                            | CA        | -0.05141 | -0.07765 |
| H          | HC        | 0.01228  | 0.00911  | C19                           | CT        | 0.00179  | -0.01897 |
| H          | HC        | 0.01228  | 0.00911  | H                             | HC        | 0.04429  | 0.02453  |
| H          | HC        | 0.01228  | 0.00911  | H                             | HC        | 0.04429  | 0.02453  |
| C17        | CT        | -0.01344 | -0.01886 | H                             | HC        | 0.04429  | 0.02453  |
| H          | HC        | 0.00070  | -0.00312 | C10                           | CA        | -0.07518 | -0.10232 |
| H          | HC        | 0.00070  | -0.00312 | H                             | HA        | 0.02535  | 0.01643  |
| H          | HC        | 0.00070  | -0.00312 | C11                           | CA        | -0.04160 | -0.05948 |
| C5         | CM        | 0.03438  | 0.01428  | H                             | HA        | 0.15666  | 0.15711  |
| C18        | CT        | -0.00550 | -0.01434 | C12                           | CA        | -0.19867 | -0.31224 |
| H          | HC        | 0.00664  | 0.00098  | H                             | HA        | 0.13259  | 0.09108  |
| H          | HC        | 0.00664  | 0.00098  | C13                           | CA        | -0.11583 | -0.13365 |
| H          | HC        | 0.00664  | 0.00098  | C20                           | CT        | 0.02796  | 0.02643  |
| C2         | CT        | 0.00558  | 0.00183  | H                             | HC        | 0.05765  | 0.05995  |
| H          | HC        | 0.01363  | 0.01029  | H                             | HC        | 0.05765  | 0.05995  |
| H          | HC        | 0.01363  | 0.01029  | H                             | HC        | 0.05765  | 0.05995  |
| C3         | CT        | -0.00649 | -0.01163 | C14                           | CA        | 0.04429  | 0.13197  |
| H          | HC        | -0.00803 | -0.01322 | H                             | HA        | 0.13363  | 0.33794  |
| H          | HC        | -0.00803 | -0.01322 | C15                           | CA        | 0.39916  | 0.20567  |
| C4         | CT        | 0.00292  | -0.00930 | H                             | HA        | 0.12354  | -0.05957 |
| H          | HC        | 0.01361  | 0.00247  | N <sup>a</sup>                | N2        | -0.34790 | -0.40132 |
| H          | HC        | 0.01361  | 0.00247  | H <sub>PSB</sub> <sup>a</sup> | H         | 0.31707  | -        |
| C7         | CA        | -0.03367 | -0.06291 |                               |           |          |          |
| H          | HA        | 0.01673  | -0.00830 | SUM                           |           | +1.00000 | 0.00000  |

<sup>a</sup> NH (NH<sub>2</sub>) moiety of SBR (PSBR) in QM/MM calculations must be arranged as N (NH) for pure force-field calculations, in other words, link atom charge must be distributed to the remaining. We performed additional calculations extending the model part to the full Lys296 for PSBR. The resulting RESP charge of N atom was assigned to N and the remaining charge that completes overall charge of the model system to 1 was assigned to H<sub>PSB</sub>. For SBR, additional calculations were not performed. Summation of the charges of N and link atom was assigned to the charge of N simply.

There are also no standard charges for side-chain bound Lys atoms. Even in its presence, the charges must be redistributed as N terminal atoms are in the model part to make total charge outside the model part integer (0). Except CD and CE atoms and H atoms attached to them, standard AMBER charges for the charged Lys were used. Although ONIOM(QM:MM) calculations with electronic embedding are not suffering from overpolarization problem due to MM charges at QM/MM border next to the link atom seen in conventional QM/MM methods (ref 44 of the paper), the charge on CE atom was set to zero to be at the safer side analogous to previous ONIOM calculations performed by other groups (refs 9 and 10 of the paper). The remaining charge that complete the total charge to zero is distributed to CD atom and attached hydrogens to it as well as hydrogens attached to CE atom with a ratio of 1:2 for H:C for making CH<sub>2</sub> group charges unchanged (see Table 2.2). Our ONIOM test calculations with the modification of these charges and giving some values to the CE atom charges show that geometries and excitation energies are not much sensitive to those charges. During the RESP charge calculation of model part, Lys296 charges were treated as in Table 2.2.

**Table 2.** RESP charges of the atoms of side-chain bound Lys outside the model part.

| Atom Index      | Atom Type | RESP    |
|-----------------|-----------|---------|
| N               | N         | -0.3479 |
| H               | H         | 0.2747  |
| CA              | CT        | -0.2400 |
| HA              | H1        | 0.1426  |
| CB              | CT        | -0.0094 |
| HB              | HC        | 0.0362  |
| HB              | HC        | 0.0362  |
| CG              | CT        | 0.0187  |
| HG              | HC        | 0.0103  |
| HG              | HC        | 0.0103  |
| CD              | CT        | -0.1744 |
| HD              | HC        | -0.0012 |
| HD              | HC        | -0.0012 |
| CE <sup>b</sup> | CT        | 0.0000  |
| HE <sup>b</sup> | H1        | 0.0502  |
| HE <sup>b</sup> | H1        | 0.0502  |
| C               | C         | 0.7341  |
| O               | O         | -0.5894 |
| SUM             |           | 0.0000  |

The missing AMBER bond parameters for retinal and its connection to Lys296 were taken as follows.

|         |    |    |    |      |       |
|---------|----|----|----|------|-------|
| HrmBnd1 | N2 | CA | HA | 20.0 | 122.0 |
| HrmBnd1 | N2 | CA | CA | 30.0 | 118.0 |
| HrmBnd1 | CM | CT | CT | 25.0 | 114.0 |
| HrmBnd1 | CM | CA | HA | 20.0 | 114.0 |
| HrmBnd1 | CM | CA | CA | 25.0 | 132.0 |
| HrmBnd1 | CT | CM | CA | 25.0 | 120.0 |
| HrmBnd1 | CT | CM | CT | 25.0 | 110.0 |

### 3. Vertical Excitation Energies and Oscillator Strengths

Vertical excitation energies from ground state singlet to first ( $S_0 \rightarrow S_1$ ) and second ( $S_0 \rightarrow S_2$ ) lowest energy singlet states as well as their oscillator strengths  $f$  (in parenthesis) calculated at different ONIOM(TD-DFT:MM) levels for wild type bovine rhodopsin with PSBR are given in this section for both WT enzyme and some of its mutants.

#### 3.1. WT Enzyme with PSBR

**Table 3.1.1.** Calculated vertical  $S_0 \rightarrow S_1$  excitation energies in nm (oscillator strengths)

| Excitation <sup>a</sup>     | Geometry                     |                              |                 |
|-----------------------------|------------------------------|------------------------------|-----------------|
|                             | B3LYP:MM-ME                  | BLYP:MM-ME                   | DFTB:MM-ME      |
| TD-B3LYP                    | 534.86 (1.1440) <sup>b</sup> | 541.02 (1.2029)              | 532.53 (1.2385) |
| TD-B3LYP:MM-ME              | 503.82 (1.1440)              | 515.70 (1.2029)              | 509.52 (1.2385) |
| TD-B3LYP:MM-EE <sup>c</sup> | 504.97 (1.2602)              | 516.18 (1.2861)              | 509.16 (1.3110) |
| TD-BLYP                     | 577.56 (0.7510)              | 577.66 (0.8226)              | 565.60 (0.8810) |
| TD-BLYP:MM-ME               | 542.58 (0.7510)              | 549.31 (0.8226)              | 540.26 (0.8810) |
| TD-BLYP:MM-EE               | 543.31 (0.8458)              | 550.56 (0.8894) <sup>d</sup> | 540.63 (0.9391) |

<sup>a</sup> Experiment: 500 nm

<sup>b</sup> TD-B3LYP excitation energy of the isolated QM region at B3LYP:MM-EE geometry: 559.82 nm (0.8180)

<sup>c</sup> TD-B3LYP:MM-EE excitation energies on B3LYP:MM-EE/BLYP:MM-EE geometries: 503.28 nm (0.9976) / 514.73 nm (1.0966).

<sup>d</sup> TD-BLYP:MM-EE excitation energy on BLYP:MM-EE geometry: 571.64 nm (0.6483).

**Table 3.1.2.** Calculated vertical  $S_0 \rightarrow S_2$  excitation energies in nm (oscillator strengths)

| Excitation <sup>a</sup>     | Geometry                     |                              |                 |
|-----------------------------|------------------------------|------------------------------|-----------------|
|                             | B3LYP:MM-ME                  | BLYP:MM-ME                   | DFTB:MM-ME      |
| TD-B3LYP                    | 407.03 (0.3882) <sup>b</sup> | 412.53 (0.3179)              | 405.97 (0.2766) |
| TD-B3LYP:MM-ME              | 386.37 (0.3882)              | 393.61 (0.3179)              | 389.12 (0.2766) |
| TD-B3LYP:MM-EE <sup>c</sup> | 388.84 (0.3019)              | 397.02 (0.2660)              | 392.29 (0.2311) |
| TD-BLYP                     | 463.32 (0.6495)              | 473.70 (0.5699)              | 468.29 (0.5149) |
| TD-BLYP:MM-ME               | 440.77 (0.6495)              | 452.62 (0.5699)              | 449.63 (0.5149) |
| TD-BLYP:MM-EE               | 447.38 (0.6048)              | 459.29 (0.5484) <sup>d</sup> | 455.77 (0.4931) |

<sup>a</sup> Experiment: 380 nm

<sup>b</sup> TD-B3LYP excitation energy of the isolated QM region at B3LYP:MM-EE geometry: 410.00 nm (0.6780)

<sup>c</sup> TD-B3LYP:MM-EE excitation energies on B3LYP:MM-EE/BLYP:MM-EE geometries: 381.13 nm (0.5273)/389.62 nm (0.4722).

<sup>d</sup> TD-BLYP:MM-EE excitation energy on BLYP:MM-EE geometry: 443.00 nm (0.8226).

TD-B3LYP:MM-EE//B3LYP:MM-ME level  $S_0 \rightarrow S_1$  /  $S_0 \rightarrow S_2$  vertical excitation energy ( $f$ )

(a) turning the charge of Glu113 off: 535.20 nm (1.1196) / 409.17 nm (0.3871)

(b) including all Glu113 atoms into the model system: 498.62 nm (0.8728) / 385.24 nm (0.2200), which is similar to TD-B3LYP:MM-ME//B3LYP:MM-ME result of 500.15 nm (1.3528) / 386.79 nm (0.2703) with Glu113 in the model part. When Glu113 is included in the model part, no further geometry relaxation was performed.

### 3.2. WT Enzyme with SBR and Protonated Glu113

Hydrogen atom of PSBR was moved to OE2 atom of Glu113. When it is moved to OE1, the structure is 1.8 kcal/mol less stable but gives almost the same excitation energies.

**Table 3.2.1.** Calculated vertical  $S_0 \rightarrow S_1$  excitation energies in nm (oscillator strengths)

| Excitation                  | Geometry                     |                              |                 |
|-----------------------------|------------------------------|------------------------------|-----------------|
|                             | B3LYP:MM-ME                  | BLYP:MM-ME                   | DFTB:MM-ME      |
| TD-B3LYP                    | 400.45 (1.2058) <sup>a</sup> | 419.68 (1.1842)              | 415.49 (1.2604) |
| TD-B3LYP:MM-ME              | 399.40 (1.2058)              | 418.03 (1.1842)              | 415.29 (1.2604) |
| TD-B3LYP:MM-EE <sup>b</sup> | 412.32 (1.1285)              | 430.35 (1.1267)              | 426.81 (1.1910) |
| TD-BLYP                     | 463.57 (0.6609)              | 482.56 (0.6436)              | 472.24 (0.7667) |
| TD-BLYP:MM-ME               | 458.56 (0.6609)              | 475.15 (0.6436)              | 470.21 (0.7667) |
| TD-BLYP:MM-EE               | 480.71 (0.6085)              | 496.92 (0.6056) <sup>c</sup> | 488.09 (0.7097) |

<sup>a</sup> TD-B3LYP excitation energy of the isolated QM region at B3LYP:MM-EE geometry: 407.51 nm (1.2124)

<sup>b</sup> TD-B3LYP:MM-EE excitation energies on B3LYP:MM-EE/BLYP:MM-EE geometries: 428.8 nm (1.0684)/447.31 nm (1.0970)

<sup>c</sup> TD-BLYP:MM-EE excitation energy on BLYP:MM-EE geometry: 513.21 nm (0.6137).

**Table 3.2.2.** Calculated vertical  $S_0 \rightarrow S_2$  excitation energies in nm (oscillator strengths)

| Excitation                  | Geometry                     |                              |                 |
|-----------------------------|------------------------------|------------------------------|-----------------|
|                             | B3LYP:MM-ME                  | BLYP:MM-ME                   | DFTB:MM-ME      |
| TD-B3LYP                    | 324.07 (0.1011) <sup>a</sup> | 336.36 (0.3513)              | 335.57 (0.0178) |
| TD-B3LYP:MM-ME              | 307.20 (0.1011)              | 332.95 (0.3513)              | 311.86 (0.0178) |
| TD-B3LYP:MM-EE <sup>b</sup> | 325.34 (0.4423)              | 339.03 (0.4340)              | 334.27 (0.3796) |
| TD-BLYP                     | 416.79 (0.0027)              | 428.98 (0.0044)              | 439.98 (0.0002) |
| TD-BLYP:MM-ME               | 372.73 (0.0027)              | 383.25 (0.0044)              | 390.64 (0.0002) |
| TD-BLYP:MM-EE               | 381.04 (0.7909)              | 395.66 (0.8065) <sup>c</sup> | 391.44 (0.7285) |

<sup>a</sup> TD-B3LYP excitation energy of the isolated QM region at B3LYP:MM-EE geometry: 333.56 nm (0.0006)

<sup>b</sup> TD-B3LYP:MM-EE excitation energies on B3LYP:MM-EE/BLYP:MM-EE geometries: 333.64 nm (0.4692)/346.84 nm (0.4519)

<sup>c</sup> TD-BLYP:MM-EE excitation energy on BLYP:MM-EE geometry: 403.16 nm (0.0607).

### 3.3. WT Enzyme with SBR and Deprotonated Glu113

**Table 3.3.1.** Calculated vertical  $S_0 \rightarrow S_1$  excitation energies in nm (oscillator strengths)

| Excitation                  | Geometry                     |                              |                 |
|-----------------------------|------------------------------|------------------------------|-----------------|
|                             | B3LYP:MM-ME                  | BLYP:MM-ME                   | DFTB:MM-ME      |
| TD-B3LYP                    | 398.96 (1.1368) <sup>a</sup> | 418.10 (1.1645)              | 411.85 (1.1951) |
| TD-B3LYP:MM-ME              | 366.40 (1.1368)              | 385.87 (1.1645)              | 381.81 (1.1951) |
| TD-B3LYP:MM-EE <sup>b</sup> | 382.18 (1.4682)              | 400.64 (1.4788)              | 396.67 (1.4706) |
| TD-BLYP                     | 466.41 (0.5823)              | 484.10 (0.6131)              | 473.34 (0.6780) |
| TD-BLYP:MM-ME               | 409.88 (0.0003)              | 426.80 (0.6131)              | 434.77 (0.0008) |
| TD-BLYP:MM-EE               | 472.64 (0.0018)              | 482.56 (0.0013) <sup>c</sup> | 503.90 (0.0017) |

<sup>a</sup> TD-B3LYP excitation energy of the isolated QM region at B3LYP:MM-EE geometry: 396.27 nm (1.0999)

<sup>b</sup> TD-B3LYP:MM-EE excitation energies on B3LYP:MM-EE/BLYP:MM-EE geometries: 379.75 nm (1.4087)/399.22 nm (1.4656)

<sup>c</sup> TD-BLYP:MM-EE excitation energy on BLYP:MM-EE geometry: 455.30 nm (0.0026).

**Table 3.3.2.** Calculated vertical  $S_0 \rightarrow S_2$  excitation energies in nm (oscillator strengths)

| Excitation                  | Geometry                     |                              |                 |
|-----------------------------|------------------------------|------------------------------|-----------------|
|                             | B3LYP:MM-ME                  | BLYP:MM-ME                   | DFTB:MM-ME      |
| TD-B3LYP                    | 327.65 (0.0013) <sup>a</sup> | 337.71 (0.3974)              | 342.19 (0.0021) |
| TD-B3LYP:MM-ME              | 314.79 (0.0013)              | 334.27 (0.3974)              | 328.50 (0.0021) |
| TD-B3LYP:MM-EE <sup>b</sup> | 348.57 (0.0010)              | 356.16 (0.0007)              | 364.80 (0.0008) |
| TD-BLYP                     | 424.63 (0.0003)              | 436.11 (0.0003)              | 451.19 (0.0008) |
| TD-BLYP:MM-ME               | 406.20 (0.5823)              | 418.31 (0.0003)              | 421.45 (0.6780) |
| TD-BLYP:MM-EE               | 421.76 (1.1784)              | 440.18 (1.1596) <sup>c</sup> | 434.91 (1.2331) |

<sup>a</sup> TD-B3LYP excitation energy of the isolated QM region at B3LYP:MM-EE geometry: 322.77 nm (0.3088)

<sup>b</sup> TD-B3LYP:MM-EE excitation energies on B3LYP:MM-EE/BLYP:MM-EE geometries: 340.76 nm (0.0012) /344.22 nm (0.0014)

<sup>c</sup> TD-BLYP:MM-EE excitation energy on BLYP:MM-EE geometry: 443.86 nm (0.3954).

### 3.4. E122Q Mutant with PSBR

The results in the following were obtained with a Q122 conformation whose  $\text{NH}_2$  moiety was oriented towards one of the methyl groups attached to C1 atom of the chromophore (Conformation A).

**Table 3.4.1.** Calculated vertical  $S_0 \rightarrow S_1$  excitation energies in nm (oscillator strengths)

| Excitation <sup>a</sup>     | Geometry                     |                 |                 |
|-----------------------------|------------------------------|-----------------|-----------------|
|                             | B3LYP:MM-ME                  | BLYP:MM-ME      | DFTB:MM-ME      |
| TD-B3LYP                    | 532.89 (1.1584) <sup>b</sup> | 539.09 (1.2275) | 533.40 (1.2278) |
| TD-B3LYP:MM-ME              | 502.70 (1.1584)              | 511.78 (1.2275) | 507.11 (1.2278) |
| TD-B3LYP:MM-EE <sup>c</sup> | 496.99 (1.3068)              | 511.02 (1.3235) | 506.54 (1.3157) |
| TD-BLYP                     | 577.32 (0.7520)              | 573.83 (0.8557) | 567.05 (0.8691) |
| TD-BLYP:MM-ME               | 536.76 (0.7520)              | 543.06 (0.8557) | 537.92 (0.8691) |
| TD-BLYP:MM-EE               | 535.87 (0.8718)              | 542.98 (0.9444) | 538.08 (0.9464) |

<sup>a</sup> Experiment: 480 nm

<sup>b</sup> TD-B3LYP excitation energy of the isolated QM region at B3LYP:MM-EE geometry: 565.84 nm (0.7724)

<sup>c</sup> TD-B3LYP:MM-EE excitation energies on B3LYP:MM-EE/BLYP:MM-EE geometries: 491.52 nm (1.0237)/505.15 nm (1.1475)

**Table 3.4.2.** Calculated vertical  $S_0 \rightarrow S_2$  excitation energies in nm (oscillator strengths)

| Excitation                  | Geometry                     |                 |                 |
|-----------------------------|------------------------------|-----------------|-----------------|
|                             | B3LYP:MM-ME                  | BLYP:MM-ME      | DFTB:MM-ME      |
| TD-B3LYP                    | 404.26 (0.4146) <sup>a</sup> | 412.02 (0.2951) | 406.74 (0.2845) |
| TD-B3LYP:MM-ME              | 384.37 (0.4146)              | 391.00 (0.2951) | 387.64 (0.2845) |
| TD-B3LYP:MM-EE <sup>b</sup> | 385.65 (0.2939)              | 394.65 (0.2257) | 391.23 (0.2213) |
| TD-BLYP                     | 459.71 (0.6896)              | 474.00 (0.5417) | 468.73 (0.5234) |
| TD-BLYP:MM-ME               | 433.75 (0.6896)              | 450.52 (0.5417) | 447.50 (0.5234) |
| TD-BLYP:MM-EE               | 442.49 (0.6175)              | 458.51 (0.4945) | 455.05 (0.4828) |

<sup>a</sup> TD-B3LYP excitation energy of the isolated QM region at B3LYP:MM-EE geometry: 410.13 nm (0.7284)

<sup>b</sup> TD-B3LYP:MM-EE excitation energies on B3LYP:MM-EE/BLYP:MM-EE geometries: 374.88 nm (0.5137)/384.07 nm (0.4189)

When  $\text{O}=\text{C}-\text{NH}_2$  plane of Q112 is rotated by ca.  $90^\circ$  (Conformation B), less consistent results with experiment is obtained: TD-B3LYP//B3LYP:MM-ME, 543.90 nm (1.0039)  $\rightarrow$  B3LYP(ME//ME), 509.07 nm (1.0039)  $\rightarrow$  B3LYP(EE//ME), 512.16 nm (1.1217)  $\rightarrow$  TD-B3LYP//B3LYP:MM-EE, 566.39 nm (0.7764)  $\rightarrow$  B3LYP(EE//EE), 513.46 nm (0.9093)

### 3.5. E122Q Mutant with SBR and Protonated Glu113

The results in this section were obtained on Conformation A (see Section 3.4).

**Table 3.5.1.** Calculated vertical  $S_0 \rightarrow S_1$  excitation energies in nm (oscillator strengths)

| Excitation                  | Geometry                     |                              |                 |
|-----------------------------|------------------------------|------------------------------|-----------------|
|                             | B3LYP:MM-ME                  | BLYP:MM-ME                   | DFTB:MM-ME      |
| TD-B3LYP                    | 401.99 (1.2058) <sup>a</sup> | 421.64 (1.2264)              | 414.33 (1.2715) |
| TD-B3LYP:MM-ME              | 394.66 (1.2058)              | 415.17 (1.2264)              | 409.31 (1.2715) |
| TD-B3LYP:MM-EE <sup>b</sup> | 406.20 (1.2222)              | 425.50 (0.0763)              | 418.54 (1.2722) |
| TD-BLYP                     | 464.51 (0.6651)              | 481.62 (0.7032)              | 471.20 (0.7780) |
| TD-BLYP:MM-ME               | 449.27 (0.6651)              | 467.52 (0.7032)              | 460.89 (0.7780) |
| TD-BLYP:MM-EE               | 466.52 (0.6962)              | 483.23 (0.7305) <sup>c</sup> | 474.95 (0.7822) |

<sup>a</sup>TD-B3LYP excitation energy of the isolated QM region at B3LYP:MM-EE geometry: 407.21 nm (1.2063)

<sup>b</sup>TD-B3LYP:MM-EE excitation energies on B3LYP:MM-EE/BLYP:MM-EE geometries: 417.98 nm (1.1653) / 436.87 nm (1.1997)

<sup>c</sup>TD-BLYP:MM-EE excitation energy on BLYP:MM-EE geometry: 495.91 nm (0.6973).

**Table 3.5.2.** Calculated vertical  $S_0 \rightarrow S_2$  excitation energies in nm (oscillator strengths)

| Excitation                  | Geometry                     |                              |                 |
|-----------------------------|------------------------------|------------------------------|-----------------|
|                             | B3LYP:MM-ME                  | BLYP:MM-ME                   | DFTB:MM-ME      |
| TD-B3LYP                    | 325.14 (0.0894) <sup>a</sup> | 337.03 (0.0694)              | 336.02 (0.0131) |
| TD-B3LYP:MM-ME              | 307.83 (0.0894)              | 331.83 (0.0694)              | 314.95 (0.0131) |
| TD-B3LYP:MM-EE <sup>b</sup> | 322.51 (0.3551)              | 336.65 (0.3324)              | 332.70 (0.2915) |
| TD-BLYP                     | 418.40 (0.0033)              | 431.66 (0.0057)              | 440.32 (0.0003) |
| TD-BLYP:MM-ME               | 378.14 (0.0033)              | 389.99 (0.0057)              | 398.07 (0.0003) |
| TD-BLYP:MM-EE               | 379.24 (0.7328)              | 394.97 (0.7157) <sup>c</sup> | 392.04 (0.6449) |

<sup>a</sup>TD-B3LYP excitation energy of the isolated QM region at B3LYP:MM-EE geometry: 333.90 nm (0.0032)

<sup>b</sup>TD-B3LYP:MM-EE excitation energies on B3LYP:MM-EE/BLYP:MM-EE geometries: 328.09 nm (0.3998) / 341.74 nm (0.3801)

<sup>c</sup>TD-BLYP:MM-EE excitation energy on BLYP:MM-EE geometry: 399.57 nm (0.7604).

### 3.6. E122Q Mutant with SBR and Deprotonated Glu113

The results in this section were obtained on Conformation A (see Section 3.4).

**Table 3.6.1.** Calculated vertical  $S_0 \rightarrow S_1$  excitation energies in nm (oscillator strengths)

| Excitation                  | Geometry                     |                              |                 |
|-----------------------------|------------------------------|------------------------------|-----------------|
|                             | B3LYP:MM-ME                  | BLYP:MM-ME                   | DFTB:MM-ME      |
| TD-B3LYP                    | 398.93 (1.1248) <sup>a</sup> | 417.67 (1.1927)              | 412.21 (1.2151) |
| TD-B3LYP:MM-ME              | 361.52 (1.1248)              | 381.55 (1.1927)              | 378.47 (1.2151) |
| TD-B3LYP:MM-EE <sup>b</sup> | 382.30 (1.4663)              | 400.76 (1.5140)              | 397.76 (1.4843) |
| TD-BLYP                     | 467.45 (0.5663)              | 482.48 (0.6367)              | 472.74 (0.6980) |
| TD-BLYP:MM-ME               | 397.45 (0.5663)              | 419.81 (0.6367)              | 414.69 (0.6980) |
| TD-BLYP:MM-EE               | 486.16 (0.0017)              | 490.39 (0.0012) <sup>c</sup> | 519.91 (0.0018) |

<sup>a</sup>TD-B3LYP excitation energy of the isolated QM region at B3LYP:MM-EE geometry: 396.82 nm (1.1051)

<sup>b</sup>TD-B3LYP:MM-EE excitation energies on B3LYP:MM-EE/BLYP:MM-EE geometries: 379.00 nm (1.4578) / 417.32 nm (1.3038)

<sup>c</sup>TD-BLYP:MM-EE excitation energy on BLYP:MM-EE geometry: 467.09 nm (0.0007).

**Table 3.6.2.** Calculated vertical  $S_0 \rightarrow S_1$  excitation energies in nm (oscillator strengths)

| Excitation                  | Geometry                     |                              |                 |
|-----------------------------|------------------------------|------------------------------|-----------------|
|                             | B3LYP:MM-ME                  | BLYP:MM-ME                   | DFTB:MM-ME      |
| TD-B3LYP                    | 328.15 (0.0006) <sup>a</sup> | 337.23 (0.3920)              | 343.07 (0.0013) |
| TD-B3LYP:MM-ME              | 318.18 (0.0006)              | 333.04 (0.3920)              | 332.30 (0.0013) |
| TD-B3LYP:MM-EE <sup>b</sup> | 353.92 (0.0010)              | 359.05 (0.0007)              | 371.31 (0.0012) |
| TD-BLYP                     | 425.42 (0.0004)              | 436.00 (0.7833)              | 452.99 (0.0011) |
| TD-BLYP:MM-ME               | 416.87 (0.0004)              | 423.70 (0.7833)              | 443.23 (0.0011) |
| TD-BLYP:MM-EE               | 419.87 (1.2621)              | 437.10 (1.3142) <sup>c</sup> | 434.01 (1.3125) |

<sup>a</sup> TD-B3LYP excitation energy of the isolated QM region at B3LYP:MM-EE geometry: 323.46 nm (0.3683)

<sup>b</sup> TD-B3LYP:MM-EE excitation energies on B3LYP:MM-EE/BLYP:MM-EE geometries: 344.94 (0.0009) /336.14 nm (0.2707)

<sup>c</sup> TD-BLYP:MM-EE excitation energy on BLYP:MM-EE geometry: 435.09 nm (1.2106).

### 3.7. E113Q Mutant with SBR

**Table 3.7.1.** Calculated vertical  $S_0 \rightarrow S_1$  excitation energies in nm (oscillator strengths) when Gln is oriented to form an H-bond with SBR (Conformation A).

| Excitation <sup>a</sup>     | Geometry <sup>c</sup>        |                              |                 |
|-----------------------------|------------------------------|------------------------------|-----------------|
|                             | B3LYP:MM-ME                  | BLYP:MM-ME                   | DFTB:MM-ME      |
| TD-B3LYP                    | 398.97 (1.2113) <sup>b</sup> | 418.45 (1.2753)              | 414.63 (1.2455) |
| TD-B3LYP:MM-ME              | 396.28 (1.2113)              | 414.69 (1.2753)              | 411.52 (1.2455) |
| TD-B3LYP:MM-EE <sup>c</sup> | 408.13 (1.1563)              | 423.27 (1.2507)              | 422.01 (1.2044) |
| TD-BLYP                     | 461.60 (0.6680)              | 477.35 (0.7546)              | 472.13 (0.7597) |
| TD-BLYP:MM-ME               | 453.63 (0.6680)              | 468.72 (0.7546)              | 465.61 (0.7597) |
| TD-BLYP:MM-EE               | 474.42 (0.6307)              | 483.33 (0.7352) <sup>d</sup> | 482.28 (0.7223) |

<sup>a</sup> Experiment: 384 nm

<sup>b</sup> TD-B3LYP excitation energy of the isolated QM region at B3LYP:MM-EE geometry: 407.09 nm (1.1940)

<sup>c</sup> TD-B3LYP:MM-EE excitation energies on B3LYP:MM-EE/BLYP:MM-EE geometries: 425.39 nm (1.0722) /434.82 nm (1.2009)

<sup>d</sup> TD-BLYP:MM-EE excitation energy on BLYP:MM-EE geometry: 496.29 nm (0.7047).

<sup>e</sup> The results are almost the same when including Q113 in the model part on geometries optimized without including it in the model part (TD-B3LYP:MM-ME//B3LYP:MM-ME  $\rightarrow$  TD-B3LYP:MM-EE//B3LYP:MM-ME  $\rightarrow$  TD-B3LYP:MM-EE//B3LYP:MM-EE: 405.98 nm (1.2706)  $\rightarrow$  412.46 nm (1.2746)  $\rightarrow$  396.64 nm (1.2990)).

**Table 3.7.2.** Calculated vertical  $S_0 \rightarrow S_2$  excitation energies in nm (oscillator strengths) when Gln is oriented to form an H-bond with SBR (Conformation A).

| Excitation                  | Geometry <sup>d</sup>        |                              |                 |
|-----------------------------|------------------------------|------------------------------|-----------------|
|                             | B3LYP:MM-ME                  | BLYP:MM-ME                   | DFTB:MM-ME      |
| TD-B3LYP                    | 324.00 (0.0515) <sup>a</sup> | 334.98 (0.3056)              | 337.51 (0.0070) |
| TD-B3LYP:MM-ME              | 304.49 (0.0515)              | 335.49 (0.3056)              | 314.69 (0.0070) |
| TD-B3LYP:MM-EE <sup>b</sup> | 323.34 (0.4197)              | 335.77 (0.3393)              | 333.00 (0.3475) |
| TD-BLYP                     | 417.87 (0.0018)              | 425.70 (0.0028)              | 443.18 (0.0002) |
| TD-BLYP:MM-ME               | 374.36 (0.0018)              | 392.96 (0.0028)              | 398.26 (0.0002) |
| TD-BLYP:MM-EE               | 378.93 (0.7873)              | 394.67 (0.7162) <sup>c</sup> | 390.90 (0.6933) |

<sup>a</sup> TD-B3LYP excitation energy of the isolated QM region at B3LYP:MM-EE geometry: 332.41 nm (0.0008)

<sup>b</sup> TD-B3LYP:MM-EE excitation energies on B3LYP:MM-EE/BLYP:MM-EE geometries: 331.74 nm (0.4650) /339.63 nm (0.3994)

<sup>c</sup> TD-BLYP:MM-EE excitation energy on BLYP:MM-EE geometry: 397.24 nm (0.7715).

<sup>d</sup> The results are almost the same when including Q113 in the model part on geometries optimized without including it in the model part (TD-B3LYP:MM-ME//B3LYP:MM-ME  $\rightarrow$  TD-B3LYP:MM-EE//B3LYP:MM-ME  $\rightarrow$  TD-B3LYP:MM-EE//B3LYP:MM-EE: 323.02 nm (0.3828)  $\rightarrow$  324.06 nm (0.3588)  $\rightarrow$  324.28 nm (0.3084)).



**Table 3.7.3.** Calculated vertical  $S_0 \rightarrow S_1$  excitation energies in nm (oscillator strengths) when side chain  $\text{NH}_2$  group and carbonyl O moieties of Q113 are oriented towards its backbone carbonyl O and SBR-N, respectively (Conformation B).

| Excitation <sup>a</sup>     | Geometry <sup>c</sup>        |                              |                 |
|-----------------------------|------------------------------|------------------------------|-----------------|
|                             | B3LYP:MM-ME                  | BLYP:MM-ME                   | DFTB:MM-ME      |
| TD-B3LYP                    | 397.92 (1.1096) <sup>b</sup> | 416.26 (1.1498)              | 416.45 (1.1899) |
| TD-B3LYP:MM-ME              | 389.58 (1.1096)              | 408.13 (1.1498)              | 408.64 (1.1899) |
| TD-B3LYP:MM-EE <sup>c</sup> | 397.27 (1.1231)              | 415.66 (1.1628)              | 415.45 (1.2035) |
| TD-BLYP                     | 466.28 (0.5554)              | 482.36 (0.6002)              | 476.53 (0.7051) |
| TD-BLYP:MM-ME               | 449.61 (0.5554)              | 466.78 (0.6002)              | 463.39 (0.7051) |
| TD-BLYP:MM-EE               | 464.69 (0.5597)              | 480.89 (0.6046) <sup>d</sup> | 474.71 (0.7111) |

<sup>a</sup> Experiment: 384 nm

<sup>b</sup> TD-B3LYP excitation energy of the isolated QM region at B3LYP:MM-EE geometry: 397.75 nm (1.1549)

<sup>c</sup> TD-B3LYP:MM-EE excitation energies on B3LYP:MM-EE/BLYP:MM-EE geometries: 409.17 nm (1.0315) / 427.54 nm (1.0496)

<sup>d</sup> TD-BLYP:MM-EE excitation energy on BLYP:MM-EE geometry: 500.09 nm (0.5369).

<sup>e</sup> The results are almost the same when including Q113 in the model part on geometries optimized without including it in the model part (TD-B3LYP:MM-ME//B3LYP:MM-ME  $\rightarrow$  TD-B3LYP:MM-EE//B3LYP:MM-ME  $\rightarrow$  TD-B3LYP:MM-EE//B3LYP:MM-EE: 390.30 nm (1.2740)  $\rightarrow$  394.67 nm (1.2618)  $\rightarrow$  404.80 nm (1.1594)).

**Table 3.7.4.** Calculated vertical  $S_0 \rightarrow S_2$  excitation energies in nm (oscillator strengths) when side chain  $\text{NH}_2$  group and carbonyl O moieties of Q113 are oriented towards its backbone carbonyl O and SBR-N, respectively (Conformation B).

| Excitation                  | Geometry <sup>d</sup>        |                              |                 |
|-----------------------------|------------------------------|------------------------------|-----------------|
|                             | B3LYP:MM-ME                  | BLYP:MM-ME                   | DFTB:MM-ME      |
| TD-B3LYP                    | 323.75 (0.3244) <sup>a</sup> | 336.26 (0.3860)              | 339.15 (0.0298) |
| TD-B3LYP:MM-ME              | 321.61 (0.3244)              | 335.71 (0.3860)              | 332.91 (0.0298) |
| TD-B3LYP:MM-EE <sup>b</sup> | 323.65 (0.3043)              | 336.22 (0.3779)              | 340.00 (0.0186) |
| TD-BLYP                     | 412.49 (0.0006)              | 422.03 (0.0015)              | 442.70 (0.0012) |
| TD-BLYP:MM-ME               | 400.22 (0.0006)              | 409.03 (0.0015)              | 429.82 (0.0012) |
| TD-BLYP:MM-EE               | 413.27 (0.0004)              | 422.78 (0.0007) <sup>c</sup> | 444.95 (0.0010) |

<sup>a</sup> TD-B3LYP excitation energy of the isolated QM region at B3LYP:MM-EE geometry: 323.56 nm (0.2613)

<sup>b</sup> TD-B3LYP:MM-EE excitation energies on B3LYP:MM-EE/BLYP:MM-EE geometries: 325.84 nm (0.0936) / 338.10 nm (0.5060)

<sup>c</sup> TD-BLYP:MM-EE excitation energy on BLYP:MM-EE geometry: 425.95 nm (0.0004).

<sup>d</sup> The results are almost the same when including Q113 in the model part on geometries optimized without including it in the model part (TD-B3LYP:MM-ME//B3LYP:MM-ME  $\rightarrow$  TD-B3LYP:MM-EE//B3LYP:MM-ME  $\rightarrow$  TD-B3LYP:MM-EE//B3LYP:MM-EE: 322.48 nm (0.2689)  $\rightarrow$  321.74 nm (0.2722)  $\rightarrow$  322.41 nm (0.4019)).

When side chain  $\text{NH}_2$  and carbonyl O moieties of Q113 are oriented, respectively, towards Gly90 and SBR-N, vertical  $S_0 \rightarrow S_1$  /  $S_0 \rightarrow S_2$  excitation energies in nm (oscillator strengths) are calculated as follows (Conformation C): TD-B3LYP//B3LYP:MM-ME, 391.38 nm (1.2220) / 320.62 nm (0.0470) B3LYP(ME//ME), 388.87 nm (1.2220) / 311.19 nm (0.0470)  $\rightarrow$  B3LYP(EE//ME), 396.99 nm (1.1605) / 321.13 nm (0.4417)  $\rightarrow$  TD-B3LYP//B3LYP:MM-EE, 394.57 nm (1.2427) / 328.35 nm (0.0010)  $\rightarrow$  B3LYP(EE//EE), 422.04 nm (1.0043) / 336.27 nm (0.4781).

### 3.8. E113Q Mutant with PSBR

**Table 3.8.1.** Calculated vertical  $S_0 \rightarrow S_1$  excitation energies in nm (oscillator strengths) on Conformation B (see Section 3.7)

| Excitation <sup>a</sup>     | Geometry                     |                              |                 |
|-----------------------------|------------------------------|------------------------------|-----------------|
|                             | B3LYP:MM-ME                  | BLYP:MM-ME                   | DFTB:MM-ME      |
| TD-B3LYP                    | 535.78 (1.1463) <sup>b</sup> | 546.32 (1.1169)              | 532.47 (1.2454) |
| TD-B3LYP:MM-ME              | 520.58 (1.1463)              | 530.79 (1.1169)              | 519.67 (1.2454) |
| TD-B3LYP:MM-EE <sup>c</sup> | 526.40 (1.1658)              | 535.79 (1.1372)              | 524.52 (1.2575) |
| TD-BLYP                     | 577.10 (0.7593)              | 586.01 (0.7400)              | 566.64 (0.8704) |
| TD-BLYP:MM-ME               | 561.33 (0.7593)              | 570.04 (0.7400)              | 553.66 (0.8704) |
| TD-BLYP:MM-EE               | 567.36 (0.7716)              | 575.32 (0.7515) <sup>d</sup> | 558.72 (0.8758) |

<sup>a</sup> Experiment: 496 nm

<sup>b</sup> TD-B3LYP excitation energy of the isolated QM region at B3LYP:MM-EE geometry: 535.95 nm (1.1154)

<sup>c</sup> TD-B3LYP:MM-EE excitation energies on B3LYP:MM-EE/BLYP:MM-EE geometries: 530.20 nm (1.1219) / 534.36 nm (1.2228)

<sup>d</sup> TD-BLYP:MM-EE excitation energy on BLYP:MM-EE geometry: 571.77 nm (0.8217).

**Table 3.8.2.** Calculated vertical  $S_0 \rightarrow S_2$  excitation energies in nm (oscillator strengths) on Conformation B (see Section 3.7)

| Excitation                  | Geometry                     |                              |                 |
|-----------------------------|------------------------------|------------------------------|-----------------|
|                             | B3LYP:MM-ME                  | BLYP:MM-ME                   | DFTB:MM-ME      |
| TD-B3LYP                    | 407.54 (0.3659) <sup>a</sup> | 417.48 (0.3397)              | 405.38 (0.2887) |
| TD-B3LYP:MM-ME              | 397.70 (0.3659)              | 407.34 (0.3397)              | 396.92 (0.2887) |
| TD-B3LYP:MM-EE <sup>b</sup> | 401.24 (0.3569)              | 410.22 (0.3325)              | 400.12 (0.2865) |
| TD-BLYP                     | 464.66 (0.6283)              | 477.38 (0.5856)              | 467.16 (0.5493) |
| TD-BLYP:MM-ME               | 454.07(0.6283)               | 466.41 (0.5856)              | 457.71 (0.5493) |
| TD-BLYP:MM-EE               | 458.31 (0.6308)              | 469.94 (0.5912) <sup>b</sup> | 461.86 (0.0067) |

<sup>a</sup> TD-B3LYP excitation energy of the isolated QM region at B3LYP:MM-EE geometry: 407.42 nm (0.4127)

<sup>b</sup> TD-B3LYP:MM-EE excitation energies on B3LYP:MM-EE/BLYP:MM-EE geometries: 404.19 nm (0.4077) / 409.05 nm (0.3182)

<sup>c</sup> TD-BLYP:MM-EE excitation energy on BLYP:MM-EE geometry: 469.73 nm (0.5978).

### 3.9. G90D Mutant with PSBR

Calculated vertical  $S_0 \rightarrow S_1$  /  $S_0 \rightarrow S_2$  excitation energies in nm (oscillator strengths) are as follows

#### a) With Deprotonated Asp90

TD-B3LYP//B3LYP:MM-ME, 544.22 nm (1.0260) / 405.88 nm (0.5367)  $\rightarrow$  B3LYP(ME//ME), 493.02 nm (1.0260) / 378.20 nm (0.5367)  $\rightarrow$  B3LYP(EE//ME), 490.38 nm (1.2549) / 380.63 nm (0.3437)  $\rightarrow$  TD-B3LYP//B3LYP:MM-EE, 586.66 nm (0.6506) / 411.69 nm (0.7652)  $\rightarrow$  B3LYP(EE//EE), 475.26 nm (0.9720) / 362.78 nm (0.5233)

#### b) With Protonated Asp90

TD-B3LYP//B3LYP:MM-ME, 544.03 nm (1.0197) / 406.81 nm (0.5468)  $\rightarrow$  B3LYP(ME//ME), 501.20 nm (1.0197) / 384.65 nm (0.5468)  $\rightarrow$  B3LYP(EE//ME), 503.07 nm (1.1827) / 387.52 nm (0.4227)  $\rightarrow$  TD-B3LYP//B3LYP:MM-EE, 573.85 nm (0.7478) / 407.80 nm (0.7445)  $\rightarrow$  B3LYP(EE//EE), 501.58 nm (0.9496) / 377.94 nm (0.5850)

### 3.10. A292S Mutant with PSBR

Calculated vertical  $S_0 \rightarrow S_1 / S_0 \rightarrow S_2$  excitation energies in nm (oscillator strengths) are as follows when

**a)** side chain –OH unit of S292 forms an H-bond with carbonyl O of Met288 (Conformation A).

TD-B3LYP//B3LYP:MM-ME, 542.44 nm (1.0277) / 405.60 nm (0.5468)  $\rightarrow$  B3LYP(ME//ME), 499.67 nm (1.0277) / 383.43 nm (0.5468)  $\rightarrow$  B3LYP(EE//ME), 503.07 nm (1.1827) / 386.36 nm (0.4226)  $\rightarrow$  TD-B3LYP//B3LYP:MM-EE, 570.90 nm (0.7237) / 409.10 nm (0.8049)  $\rightarrow$  B3LYP(EE//EE), 501.43 nm (0.9396) / 381.23 nm (0.6300)

**b)** side chain –OH unit of S292 is oriented towards –OH unit of Ser186 (Conformation B).

TD-B3LYP//B3LYP:MM-ME, 541.79 nm (1.0210) / 406.08 nm (0.5396)  $\rightarrow$  B3LYP(ME//ME), 501.81 nm (1.0210) / 385.22 nm (0.5396)  $\rightarrow$  B3LYP(EE//ME), 504.43 nm (1.1697) / 388.00 nm (0.4283)  $\rightarrow$  TD-B3LYP//B3LYP:MM-EE, 570.23 nm (0.7139) / 409.71 nm (0.8045)  $\rightarrow$  B3LYP(EE//EE), 506.51 nm (0.9057) / 384.51 nm (0.6517)

**c)** side chain –OH unit of S292 forms an H-bond with a water molecule (Conformation C).

TD-B3LYP//B3LYP:MM-ME, 537.25 nm (1.0603) / 401.26 nm (0.5602)  $\rightarrow$  B3LYP(ME//ME), 496.19 nm (1.0603) / 378.79 nm (0.5602)  $\rightarrow$  B3LYP(EE//ME), 499.02 nm (1.2138) / 381.66 nm (0.4479)  $\rightarrow$  TD-B3LYP//B3LYP:MM-EE, 566.77 nm (0.7461) / 407.14 nm (0.7936)  $\rightarrow$  B3LYP(EE//EE), 499.65 nm (0.9507) / 378.61 nm (0.6317)

### 3.11. A269T Mutant with PSBR

Calculated vertical  $S_0 \rightarrow S_1 / S_0 \rightarrow S_2$  excitation energies in nm (oscillator strengths) are as follows when

**a)** side chain methyl moiety of T269 is oriented towards C1 (one of methyl group attached to it) and C2 atoms of the chromophore and side chain –OH unit forms an H-bond with Leu266 (Conformation A).

TD-B3LYP//B3LYP:MM-ME, 546.81 nm (0.9454) / 408.01 nm (0.6076)  $\rightarrow$  B3LYP(ME//ME), 500.36 nm (0.9454) / 385.80 nm (0.6076)  $\rightarrow$  B3LYP(EE//ME), 503.54 nm (1.1167) / 387.68 nm (0.4747)  $\rightarrow$  TD-B3LYP//B3LYP:MM-EE, 574.29 nm (0.6908) / 410.48 nm (0.8133)  $\rightarrow$  B3LYP(EE//EE), 503.35 nm (0.8988) / 382.70 nm (0.6404)

**b)** side chain methyl moiety of T269 as in a and side chain –OH unit forms an H-bond with Trp265 (Conformation B).

TD-B3LYP//B3LYP:MM-ME, 541.88 nm (1.0279) / 405.81 nm (0.5264) → B3LYP(ME//ME), 500.31 nm (1.0279) / 383.85 nm (0.5264) → B3LYP(EE//ME), 502.22 nm (1.1740) / 386.18 nm (0.4144) → TD-B3LYP//B3LYP:MM-EE, 567.89 nm (0.7430) / 407.08 nm (0.7890) → B3LYP(EE//EE), 497.98 nm (0.9527) / 378.10 nm (0.6197)

**c)** side chain methyl moiety of T269 as in a and side chain –OH unit is oriented towards backbone carbonyl O (Conformation C).

TD-B3LYP//B3LYP:MM-ME, 543.19 nm (0.9788) / 406.48 nm (0.5971) → B3LYP(ME//ME), 499.12 nm (0.9788) / 384.83 nm (0.5971) → B3LYP(EE//ME), 502.34 nm (1.1471) / 387.02 nm (0.4658) → TD-B3LYP//B3LYP:MM-EE, 571.24 nm (0.6966) / 410.44 nm (0.8133) → B3LYP(EE//EE), 506.23 nm (0.8919) / 385.20 nm (0.6522)

**d)** side chain methyl moiety of T269 is oriented towards Leu266 side chain and side chain –OH unit as in c (Conformation D)

TD-B3LYP//B3LYP:MM-ME, 542.25 nm (1.0096) / 406.10 nm (0.5657) → B3LYP(ME//ME), 501.48 nm (1.0096) / 385.37 nm (0.5657) → B3LYP(EE//ME), 504.11 nm (1.1558) / 387.53 nm (0.4555) → TD-B3LYP//B3LYP:MM-EE, 567.99 nm (0.7440) / 408.75 nm (0.7709) → B3LYP(EE//EE), 505.50 nm (0.9197) / 382.72 nm (0.6262)

### **3.12. D83N Mutant with PSBR**

Calculated vertical  $S_0 \rightarrow S_1 / S_0 \rightarrow S_2$  excitation energies in nm (oscillator strengths) are as follows: TD-B3LYP//B3LYP:MM-ME, 533.53 nm (1.1601) / 405.40 nm (0.4176) → B3LYP(ME//ME), 500.67 nm (1.1601) / 384.60 nm (0.4176) → B3LYP(EE//ME), 503.06 nm (1.2845) / 387.63 nm (0.3230) → TD-B3LYP//B3LYP:MM-EE, 570.40 nm (0.7147) / 409.74 nm (0.8111) → B3LYP(EE//EE), 502.39 nm (0.9234) / 382.12 nm (0.6410)

### **3.13. W265Y Mutant with PSBR**

Calculated vertical  $S_0 \rightarrow S_1 / S_0 \rightarrow S_2$  excitation energies in nm (oscillator strengths) are as follows: TD-B3LYP//B3LYP:MM-ME, 536.17 nm (1.0586) / 404.46 nm (0.5286) → B3LYP(ME//ME), 495.33 nm (1.0586) / 382.26 nm (0.5286) → B3LYP(EE//ME), 503.07 nm (1.1827) / 384.35 nm (0.3957) →

TD-B3LYP//B3LYP:MM-EE, 573.46 nm (0.6804) / 411.05 nm (0.8033) → B3LYP(EE//EE), 497.11 nm (0.9079) / 380.15 nm (0.6115)

### 3.14. H211C Mutant with PSBR

Calculated vertical  $S_0 \rightarrow S_1$  /  $S_0 \rightarrow S_2$  excitation energies in nm (oscillator strengths) are as follows: TD-B3LYP//B3LYP:MM-ME, 543.36 nm (0.9915) / 406.13 nm (0.5712) → B3LYP(ME//ME), 499.15 nm (0.9915) / 383.51 nm (0.5712) → B3LYP(EE//ME), 501.35 nm (1.1628) / 385.91 nm (0.4390) → TD-B3LYP//B3LYP:MM-EE, 572.86 nm (0.6922) / 410.17 nm (0.8198) → B3LYP(EE//EE), 501.13 nm (0.9155) / 381.74 nm (0.6399)

### 3.15. E181Q Mutant with PSBR

Calculated vertical  $S_0 \rightarrow S_1$  /  $S_0 \rightarrow S_2$  excitation energies in nm (oscillator strengths) are as follows

a) when OE2 atom of E181 is replaced with  $\text{NH}_2$  moiety (Conformation A).

TD-B3LYP//B3LYP:MM-ME, 541.20 nm (1.1601) / 405.16 nm (0.5261) → B3LYP(ME//ME), 498.95 nm (1.1601) / 382.83 nm (0.5261) → B3LYP(EE//ME), 500.76 nm (1.1884) / 385.46 nm (0.4073) → TD-B3LYP//B3LYP:MM-EE, 570.83 nm (0.7221) / 408.78 nm (0.7798) → B3LYP(EE//EE), 499.24 nm (0.9343) / 378.79 nm (0.6097)

b) when OE1 atom of E181 is replaced with  $\text{NH}_2$  moiety (Conformation B).

TD-B3LYP//B3LYP:MM-ME, 543.28 nm (1.0049) / 406.79 nm (0.5332) → B3LYP(ME//ME), 499.95 nm (1.0049) / 384.10 nm (0.5332) → B3LYP(EE//ME), 501.93 nm (1.1633) / 386.39 nm (0.4121) → TD-B3LYP//B3LYP:MM-EE, 570.37 nm (0.7193) / 408.30 nm (0.7889) → B3LYP(EE//EE), 500.39 nm (0.9271) / 379.60 nm (0.6244)

### 3.16. E113D Mutant with PSBR

Calculated vertical  $S_0 \rightarrow S_1$  /  $S_0 \rightarrow S_2$  excitation energies in nm (oscillator strengths) are as follows: TD-B3LYP//B3LYP:MM-ME, 533.22 nm (1.1663) / 406.10 nm (0.3760) → B3LYP(ME//ME), 503.49 nm (1.1663) / 386.33 nm (0.3760) → B3LYP(EE//ME), 504.94 nm (1.2775) / 388.90 nm (0.2947) → TD-B3LYP//B3LYP:MM-EE, 556.96 nm (0.8401) / 408.22 nm (0.7157) → B3LYP(EE//EE), 498.73 nm (1.0433) / 379.14 nm (0.5426)

## 4. Geometry Parameters of 11-*cis*-retinal

Indexing of C atoms (1-15) are as in Figure 2 of the paper. A and B correspond to chain A and B in the X-ray structures.

|                     | 1U19-A | 1U19-B | 1F88-A | 1F88-B | 1HZX-A | 1HZX-B | 1L9H-A | 1L9H-B | 1JFP   |
|---------------------|--------|--------|--------|--------|--------|--------|--------|--------|--------|
| Bond Lengths (Å)    |        |        |        |        |        |        |        |        |        |
| 1-6                 | 1.6    | 1.61   | 1.52   | 1.53   | 1.5    | 1.55   | 1.55   | 1.55   | 1.54   |
| 5-6                 | 1.43   | 1.44   | 1.36   | 1.35   | 1.38   | 1.34   | 1.41   | 1.41   | 1.36   |
| 6-7                 | 1.51   | 1.52   | 1.48   | 1.48   | 1.5    | 1.52   | 1.52   | 1.49   | 1.46   |
| 7-8                 | 1.36   | 1.36   | 1.36   | 1.36   | 1.38   | 1.38   | 1.38   | 1.36   | 1.34   |
| 8-9                 | 1.47   | 1.46   | 1.48   | 1.48   | 1.49   | 1.49   | 1.48   | 1.46   | 1.46   |
| 9-10                | 1.37   | 1.37   | 1.36   | 1.36   | 1.35   | 1.37   | 1.35   | 1.35   | 1.35   |
| 10-11               | 1.46   | 1.46   | 1.48   | 1.49   | 1.47   | 1.48   | 1.49   | 1.49   | 1.45   |
| 11-12               | 1.39   | 1.39   | 1.36   | 1.37   | 1.36   | 1.37   | 1.37   | 1.37   | 1.35   |
| 12-13               | 1.49   | 1.49   | 1.49   | 1.49   | 1.49   | 1.5    | 1.48   | 1.49   | 1.47   |
| 13-14               | 1.35   | 1.38   | 1.33   | 1.34   | 1.36   | 1.37   | 1.35   | 1.37   | 1.35   |
| 14-15               | 1.43   | 1.45   | 1.48   | 1.48   | 1.49   | 1.5    | 1.5    | 1.51   | 1.48   |
| 15-N                | 1.33   | 1.34   | 1.46   | 1.46   | 1.35   | 1.36   | 1.35   | 1.37   | 1.28   |
| N-                  |        |        |        |        |        |        |        |        |        |
| C(Leu296)           | 1.48   | 1.48   | 1.46   | 1.47   | 1.47   | 1.48   | 1.47   | 1.48   | 1.47   |
| N...O(Glu113)       | 3.45   | 3.28   | 3.22   | 3.35   | 3.6    | 3.57   | 3.13   | 3.04   | 3.35   |
| Bond Angles (°)     |        |        |        |        |        |        |        |        |        |
| 1-6-7               | 119.2  | 119.4  | 113.5  | 114.5  | 111.8  | 114.2  | 124    | 124.2  | 117.2  |
| 5-6-7               | 121.4  | 120.8  | 122.7  | 121.6  | 125    | 123.3  | 117.4  | 116.6  | 120.3  |
| 6-7-8               | 131.8  | 132.3  | 118.8  | 116    | 121.6  | 118.7  | 119.5  | 117.3  | 123.3  |
| 7-8-9               | 131.2  | 130.5  | 128.9  | 130.8  | 130.6  | 130.8  | 132.1  | 132.2  | 127.4  |
| 8-9-10              | 115.4  | 115.1  | 123.5  | 123.9  | 123    | 123.6  | 117.4  | 116.8  | 117.9  |
| 9-10-11             | 125.7  | 126    | 128.1  | 126.8  | 127.4  | 127.4  | 124.9  | 125.4  | 127.5  |
| 10-11-12            | 122.3  | 123    | 127.9  | 129.4  | 130    | 131.5  | 129.2  | 128    | 128.5  |
| 11-12-13            | 131.7  | 131.6  | 133.5  | 135.5  | 139.6  | 139.4  | 138.6  | 137.5  | 131.2  |
| 12-13-14            | 112.9  | 112.7  | 121.4  | 122.8  | 118.4  | 120.1  | 114.2  | 115.1  | 118.2  |
| 13-14-15            | 127.4  | 128.4  | 123.5  | 124.2  | 129.1  | 127.4  | 125    | 126    | 123.7  |
| 14-15-N             | 118.3  | 119.2  | 118.5  | 117.5  | 118.3  | 120.1  | 117.9  | 119    | 125.2  |
| 15-N-C              | 135.2  | 134.5  | 130.6  | 132.5  | 132.6  | 132.4  | 134.4  | 135.4  | 128.2  |
| Dihedral Angles (°) |        |        |        |        |        |        |        |        |        |
| 1-6-7-8             | 148    | 146.4  | 120.1  | 120.7  | 122.9  | 127.2  | 104    | 96.6   | -94.3  |
| 5-6-7-8             | -30.3  | -31.9  | -59.4  | -58.6  | -56.6  | -52.8  | -77.4  | -84.4  | 85.9   |
| 6-7-8-9             | -174.8 | -176.8 | 179.6  | 179.8  | 169.2  | 170.6  | -172.9 | -178.5 | 176    |
| 7-8-9-10            | 171.5  | 167    | -179.7 | -179.8 | -152.7 | -160.2 | -149.3 | -146.6 | -161.6 |
| 8-9-10-11           | -176   | -176.4 | 179.3  | 179    | 176.4  | 172.6  | 179.8  | 180    | -175.3 |
| 9-10-11-12          | 173.2  | 173.9  | 179.1  | 177.8  | 157.8  | 158.3  | 162.5  | 162.8  | -157.2 |
| 10-11-12-13         | -40.8  | -36.1  | -0.74  | -1.7   | 7.9    | 7.9    | 0      | 0.1    | 8      |
| 11-12-13-14         | -173.5 | 178.6  | 170.5  | 157    | 156.2  | 151.6  | 171.5  | 150.1  | -168.5 |
| 12-13-14-15         | 171    | 171.2  | 179.4  | 179.5  | -144.3 | -144.6 | 172.1  | 157.7  | -175.2 |
| 13-14-15-N          | 164.6  | 178.6  | -179.6 | -179.9 | -99    | -114.3 | 135.5  | -175.8 | 165.4  |

|           |        |      |       |        |        |        |        |        |        |
|-----------|--------|------|-------|--------|--------|--------|--------|--------|--------|
| 14-15-N-C | -167.9 | -166 | 179.5 | -179.8 | -167.7 | -178.1 | -178.9 | -148.3 | -154   |
| 15-N-C-C  | 55     | 47.7 | 53.8  | 35.09  | -76.5  | -4.4   | 74.2   | 37.7   | -175.9 |

In the following tables, only QM level and embedding scheme of ONIOM(QM:MM) calculations will be shown.

|                     | WT enzyme with PSBR |          |         |         |         | WT enzyme with SBR and protonated Glu113 |          |         |         |         |
|---------------------|---------------------|----------|---------|---------|---------|------------------------------------------|----------|---------|---------|---------|
|                     | b3lyp-me            | b3lyp-ee | blyp-me | blyp-ee | dffb-me | b3lyp-me                                 | b3lyp-ee | Blyp-me | blyp-ee | dffb-me |
| Bond Lengths (Å)    |                     |          |         |         |         |                                          |          |         |         |         |
| 1-6                 | 1.548               | 1.546    | 1.561   | 1.559   | 1.53    | 1.544                                    | 1.544    | 1.557   | 1.557   | 1.528   |
| 5-6                 | 1.37                | 1.359    | 1.386   | 1.375   | 1.377   | 1.356                                    | 1.356    | 1.37    | 1.37    | 1.363   |
| 6-7                 | 1.448               | 1.464    | 1.45    | 1.465   | 1.439   | 1.472                                    | 1.472    | 1.476   | 1.475   | 1.46    |
| 7-8                 | 1.371               | 1.36     | 1.386   | 1.377   | 1.378   | 1.353                                    | 1.355    | 1.367   | 1.37    | 1.362   |
| 8-9                 | 1.424               | 1.441    | 1.428   | 1.441   | 1.424   | 1.45                                     | 1.45     | 1.45    | 1.45    | 1.444   |
| 9-10                | 1.396               | 1.379    | 1.409   | 1.396   | 1.402   | 1.366                                    | 1.368    | 1.385   | 1.388   | 1.375   |
| 10-11               | 1.401               | 1.42     | 1.408   | 1.42    | 1.402   | 1.437                                    | 1.435    | 1.435   | 1.432   | 1.432   |
| 11-12               | 1.395               | 1.379    | 1.405   | 1.394   | 1.397   | 1.361                                    | 1.365    | 1.38    | 1.384   | 1.365   |
| 12-13               | 1.406               | 1.427    | 1.415   | 1.43    | 1.407   | 1.455                                    | 1.452    | 1.457   | 1.453   | 1.448   |
| 13-14               | 1.417               | 1.397    | 1.426   | 1.411   | 1.42    | 1.366                                    | 1.372    | 1.384   | 1.39    | 1.372   |
| 14-15               | 1.38                | 1.397    | 1.388   | 1.402   | 1.388   | 1.455                                    | 1.442    | 1.458   | 1.445   | 1.454   |
| 15-N                | 1.336               | 1.322    | 1.349   | 1.338   | 1.336   | 1.286                                    | 1.292    | 1.302   | 1.308   | 1.28    |
| N-C(Leu296)         | 1.466               | 1.469    | 1.473   | 1.475   | 1.479   | 1.485                                    | 1.482    | 1.495   | 1.491   | 1.496   |
| N...O(Glu113)       | 2.807               | 2.731    | 2.804   | 2.737   | 2.818   | 2.84                                     | 2.677    | 2.842   | 2.672   | 2.862   |
| Bond Angles (°)     |                     |          |         |         |         |                                          |          |         |         |         |
| 1-6-7               | 117.6               | 117.2    | 117.8   | 117.3   | 118.4   | 116.8                                    | 117      | 117.1   | 116.9   | 117.5   |
| 5-6-7               | 121.3               | 121.4    | 121.3   | 121.5   | 121.4   | 121.5                                    | 121.4    | 121     | 121.5   | 121.4   |
| 6-7-8               | 123.7               | 123      | 123.9   | 123.3   | 122.8   | 123                                      | 122.8    | 121.8   | 122.4   | 122.1   |
| 7-8-9               | 128.3               | 129      | 128.5   | 129     | 126.6   | 128.7                                    | 129.1    | 130.1   | 130.2   | 127.1   |
| 8-9-10              | 117.1               | 117.3    | 117.1   | 117.3   | 118     | 118.2                                    | 117.9    | 116.6   | 116.6   | 118.8   |
| 9-10-11             | 125                 | 124.8    | 125.3   | 125.2   | 123.5   | 125.3                                    | 125.3    | 126.7   | 126.6   | 122.4   |
| 10-11-12            | 128.8               | 129.8    | 128.6   | 129.6   | 127.2   | 129.9                                    | 130      | 129.5   | 129.4   | 128.9   |
| 11-12-13            | 130.3               | 130.6    | 130.6   | 131.1   | 129.1   | 132.4                                    | 131.8    | 132.8   | 132     | 131.1   |
| 12-13-14            | 117.5               | 116.8    | 117.2   | 116.3   | 117.5   | 116.4                                    | 116.9    | 116.7   | 117.3   | 116.1   |
| 13-14-15            | 125.6               | 123.7    | 124     | 124.4   | 123.8   | 126.5                                    | 126.4    | 127     | 126.7   | 125.9   |
| 14-15-N             | 125.4               | 124      | 125.4   | 123.7   | 123     | 121.1                                    | 121.4    | 121     | 121.4   | 121.6   |
| 15-N-C              | 124.3               | 123      | 124.1   | 122.9   | 124     | 115.8                                    | 116.2    | 115.5   | 116.2   | 118     |
| Dihedral Angles (°) |                     |          |         |         |         |                                          |          |         |         |         |
| 1-6-7-8             | 142.9               | 138.2    | 114.3   | 140.6   | 148.1   | 134.3                                    | 134.9    | 132.6   | 134.8   | 143.1   |
| 5-6-7-8             | -40.8               | -45.5    | -39.3   | -43.4   | -37.3   | -48.6                                    | -48.6    | -49.1   | -48     | -41.6   |
| 6-7-8-9             | 178.3               | 177.4    | 178.2   | 177.1   | 179.3   | 176.5                                    | 176.1    | 175.6   | 177.5   | 177.7   |
| 7-8-9-10            | 170.7               | 175.9    | 169.9   | 175.5   | 166.9   | 177.1                                    | 178.8    | 175.4   | 175.7   | 172.8   |
| 8-9-10-11           | 169.4               | 170.6    | 169.7   | 169.8   | 169.1   | 171.1                                    | 170.2    | 169.8   | 170.4   | 171.5   |
| 9-10-11-12          | 174.8               | 173.6    | 172.3   | 173     | 174.7   | 170.3                                    | 172.2    | 174.5   | 175     | 167     |
| 10-11-12-13         | -24.1               | -18.6    | -23.9   | -19.2   | -24.6   | -12                                      | -14.4    | -13     | -16.1   | -13.6   |
| 11-12-13-14         | 175.3               | 174.2    | 176.1   | 175.7   | 176.5   | 173.6                                    | 172.4    | 174     | 172.9   | 177     |
| 12-13-14-15         | 180                 | 179.4    | 178.4   | 178.1   | 177.6   | -179.1                                   | 177.5    | -179.9  | 177.3   | 180     |

|            |       |       |       |       |      |       |       |       |       |       |
|------------|-------|-------|-------|-------|------|-------|-------|-------|-------|-------|
| 13-14-15-N | 171.1 | 172.4 | 171.8 | 173.4 | 172  | 165.5 | 171.9 | 167.8 | 172.6 | 163.3 |
| 14-15-N-C  | 175.6 | 174.2 | 175.9 | 174.7 | 177  | 177.1 | 177.6 | 176.5 | 176.6 | 177.3 |
| 15-N-C-C   | 96.1  | 92    | 94.2  | 89.9  | 93.4 | 95.8  | 94.9  | 97.1  | 96.9  | 93.7  |

WT enzyme with SBR and deprotonated

Glu113

E113Q with SBR (Conformation A)

|  | b3lyp-<br>me | b3lyp-<br>ee | blyp-<br>me | blyp-<br>ee | dffb-<br>me | b3lyp-<br>me | b3lyp-<br>ee | Blyp-<br>me | blyp-<br>ee | dffb-<br>me |
|--|--------------|--------------|-------------|-------------|-------------|--------------|--------------|-------------|-------------|-------------|
|--|--------------|--------------|-------------|-------------|-------------|--------------|--------------|-------------|-------------|-------------|

Bond Lengths  
(Å)

|               |       |       |       |       |       |       |       |       |       |       |
|---------------|-------|-------|-------|-------|-------|-------|-------|-------|-------|-------|
| 1-6           | 1.546 | 1.545 | 1.558 | 1.558 | 1.528 | 1.544 | 1.544 | 1.56  | 1.559 | 1.528 |
| 5-6           | 1.358 | 1.356 | 1.372 | 1.369 | 1.363 | 1.356 | 1.356 | 1.37  | 1.37  | 1.363 |
| 6-7           | 1.475 | 1.479 | 1.478 | 1.481 | 1.463 | 1.471 | 1.472 | 1.473 | 1.474 | 1.46  |
| 7-8           | 1.355 | 1.356 | 1.371 | 1.371 | 1.363 | 1.353 | 1.355 | 1.369 | 1.371 | 1.361 |
| 8-9           | 1.453 | 1.453 | 1.453 | 1.454 | 1.447 | 1.45  | 1.45  | 1.452 | 1.452 | 1.445 |
| 9-10          | 1.368 | 1.367 | 1.386 | 1.385 | 1.376 | 1.366 | 1.368 | 1.383 | 1.385 | 1.375 |
| 10-11         | 1.443 | 1.441 | 1.442 | 1.439 | 1.436 | 1.438 | 1.436 | 1.438 | 1.436 | 1.433 |
| 11-12         | 1.362 | 1.362 | 1.379 | 1.38  | 1.367 | 1.361 | 1.364 | 1.378 | 1.381 | 1.365 |
| 12-13         | 1.456 | 1.457 | 1.456 | 1.457 | 1.449 | 1.455 | 1.453 | 1.456 | 1.454 | 1.449 |
| 13-14         | 1.396 | 1.366 | 1.386 | 1.382 | 1.375 | 1.365 | 1.371 | 1.381 | 1.385 | 1.372 |
| 14-15         | 1.455 | 1.455 | 1.457 | 1.455 | 1.455 | 1.456 | 1.444 | 1.456 | 1.447 | 1.456 |
| 15-N          | 1.282 | 1.281 | 1.298 | 1.297 | 1.277 | 1.284 | 1.291 | 1.3   | 1.305 | 1.278 |
| N-C(Leu296)   | 1.478 | 1.479 | 1.488 | 1.488 | 1.49  | 1.483 | 1.481 | 1.493 | 1.491 | 1.495 |
| N...O(Glu113) | 3.371 | 3.76  | 3.358 | 3.961 | 3.41  | -     | -     | -     | -     | -     |
| N...N(Gln113) | -     | -     | -     | -     | -     | 2.965 | 2.861 | 3.013 | 2.912 | 2.981 |

Bond Angles (°)

|          |       |       |       |       |       |       |       |       |       |       |
|----------|-------|-------|-------|-------|-------|-------|-------|-------|-------|-------|
| 1-6-7    | 118.4 | 118.7 | 118.5 | 118.2 | 119.2 | 116.8 | 117.2 | 115.6 | 115.8 | 117.3 |
| 5-6-7    | 120.8 | 120.7 | 120.9 | 121.2 | 120.8 | 121.4 | 121.3 | 122.8 | 122.6 | 121.6 |
| 6-7-8    | 122.2 | 121.4 | 122.2 | 122.2 | 121.6 | 123.1 | 122.5 | 125.4 | 125   | 122.5 |
| 7-8-9    | 129.1 | 130.1 | 129.6 | 129.9 | 126.9 | 128.7 | 129.5 | 128.1 | 128.4 | 126.7 |
| 8-9-10   | 117.8 | 117.2 | 117.7 | 117.4 | 118.7 | 118.2 | 117.6 | 118.7 | 118.3 | 118.8 |
| 9-10-11  | 126.4 | 127.1 | 126.8 | 127   | 124.5 | 125.2 | 125.3 | 125.1 | 125.3 | 122.8 |
| 10-11-12 | 130.1 | 129.4 | 129.9 | 130.1 | 128.8 | 130   | 129.9 | 129.9 | 129.8 | 128.7 |
| 11-12-13 | 132.2 | 131.9 | 132.4 | 132.9 | 131   | 132.3 | 131.4 | 132.2 | 131.7 | 131.1 |
| 12-13-14 | 117.9 | 116.9 | 117.9 | 116.2 | 118   | 116.5 | 117.1 | 116.4 | 116.9 | 116.4 |
| 13-14-15 | 124.7 | 126   | 124.9 | 127.1 | 123.9 | 126.2 | 126.3 | 127.1 | 127.2 | 125.8 |
| 14-15-N  | 121.4 | 119.6 | 121.4 | 119.1 | 122   | 120.8 | 121   | 120.2 | 120.1 | 121.4 |
| 15-N-C   | 116.5 | 116.6 | 116.1 | 116.3 | 118.9 | 116.3 | 116.5 | 115.9 | 116   | 118.7 |

Dihedral  
Angles (°)

|             |        |        |        |       |       |        |       |        |        |       |
|-------------|--------|--------|--------|-------|-------|--------|-------|--------|--------|-------|
| 1-6-7-8     | 136.2  | 133.5  | 137.6  | 136.2 | 143   | 135    | 135.3 | 138.4  | 138.2  | 143.2 |
| 5-6-7-8     | -47.5  | -49.4  | -46.2  | -47.4 | -42.4 | -47.9  | -47.9 | -45.1  | -46    | -41.6 |
| 6-7-8-9     | 172.2  | 172.2  | 172.4  | 173.6 | 174.9 | 176.4  | 176.2 | -178.3 | -179.8 | 179.1 |
| 7-8-9-10    | 179.9  | -178.8 | 179.1  | 179.6 | 174.1 | 176.7  | 178.5 | 172.1  | 174.1  | 171.9 |
| 8-9-10-11   | 169    | 168.8  | 168.3  | 169.5 | 170   | 172    | 171.2 | 175.1  | 173.8  | 173   |
| 9-10-11-12  | 168.9  | 170.1  | 170.1  | 172.4 | 167.7 | 168.9  | 170.8 | 166.7  | 170.6  | 122.4 |
| 10-11-12-13 | -12.4  | -12.7  | -13.8  | -12.4 | -13.3 | -11.2  | -14   | -12.2  | -14    | -12.6 |
| 11-12-13-14 | 173    | 172.5  | 173.9  | 177.2 | 173.2 | 174.7  | 173.5 | 172.7  | 171.2  | 175.7 |
| 12-13-14-15 | -179.6 | 177.8  | -179.3 | 176.3 | 178.9 | -178.2 | 177.9 | -177.5 | 177.9  | 179.5 |
| 13-14-15-N  | 168.6  | 170.6  | 169    | 172.5 | 167.1 | 163.4  | 172.2 | 163.5  | 170.2  | 163.6 |
| 14-15-N-C   | 179.3  | 179    | 179.5  | 179.5 | 178.7 | 177.8  | 177.9 | 177.9  | 177.5  | 176.1 |



|          |      |      |      |      |      |      |      |      |      |      |
|----------|------|------|------|------|------|------|------|------|------|------|
| 15-N-C-C | 97.3 | 98.8 | 97.3 | 92.4 | 97.6 | 95.8 | 94.4 | 93.4 | 93.3 | 96.1 |
|----------|------|------|------|------|------|------|------|------|------|------|

|                     | E113Q with SBR (Conformation B) |          |         |         |         | E113Q with PSBR |          |         |         |         |
|---------------------|---------------------------------|----------|---------|---------|---------|-----------------|----------|---------|---------|---------|
|                     | b3lyp-me                        | b3lyp-ee | blyp-me | blyp-ee | dftb-me | b3lyp-me        | b3lyp-ee | blyp-me | blyp-ee | dftb-me |
| Bond Lengths (Å)    |                                 |          |         |         |         |                 |          |         |         |         |
| 1-6                 | 1.544                           | 1.544    | 1.557   | 1.557   | 1.528   | 1.548           | 1.547    | 1.559   | 1.56    | 1.531   |
| 5-6                 | 1.357                           | 1.355    | 1.371   | 1.37    | 1.363   | 1.369           | 1.367    | 1.385   | 1.383   | 1.376   |
| 6-7                 | 1.475                           | 1.476    | 1.478   | 1.48    | 1.461   | 1.447           | 1.45     | 1.452   | 1.453   | 1.44    |
| 7-8                 | 1.354                           | 1.355    | 1.369   | 1.37    | 1.361   | 1.371           | 1.37     | 1.384   | 1.385   | 1.378   |
| 8-9                 | 1.451                           | 1.453    | 1.452   | 1.453   | 1.446   | 1.424           | 1.427    | 1.43    | 1.431   | 1.424   |
| 9-10                | 1.366                           | 1.368    | 1.384   | 1.385   | 1.375   | 1.395           | 1.393    | 1.41    | 1.407   | 1.401   |
| 10-11               | 1.44                            | 1.438    | 1.439   | 1.437   | 1.436   | 1.401           | 1.402    | 1.408   | 1.408   | 1.402   |
| 11-12               | 1.361                           | 1.363    | 1.378   | 1.38    | 1.366   | 1.395           | 1.395    | 1.409   | 1.407   | 1.396   |
| 12-13               | 1.456                           | 1.456    | 1.456   | 1.456   | 1.45    | 1.407           | 1.409    | 1.418   | 1.418   | 1.408   |
| 13-14               | 1.364                           | 1.369    | 1.38    | 1.386   | 1.372   | 1.412           | 1.413    | 1.423   | 1.423   | 1.416   |
| 14-15               | 1.451                           | 1.453    | 1.452   | 1.455   | 1.452   | 1.38            | 1.384    | 1.392   | 1.393   | 1.388   |
| 15-N                | 1.283                           | 1.284    | 1.299   | 1.299   | 1.278   | 1.338           | 1.336    | 1.352   | 1.35    | 1.338   |
| N-C(Leu296)         | 1.479                           | 1.479    | 1.489   | 1.489   | 1.491   | 1.465           | 1.467    | 1.474   | 1.475   | 1.477   |
| N...N(Gln113)       | 3.317                           | 3.469    | 3.336   | 3.413   | 3.391   | 2.921           | 2.863    | 2.888   | 2.885   | 2.968   |
| Bond Angles (°)     |                                 |          |         |         |         |                 |          |         |         |         |
| 1-6-7               | 118.2                           | 118.1    | 118.1   | 118.4   | 117.7   | 117.1           | 117.1    | 117.4   | 117.2   | 117.4   |
| 5-6-7               | 120.8                           | 120.9    | 121     | 120.8   | 121.6   | 121.7           | 121.7    | 121.4   | 121.9   | 121.8   |
| 6-7-8               | 121.8                           | 121.9    | 122.1   | 121.6   | 122.4   | 124.2           | 123.9    | 123.5   | 124.4   | 123.5   |
| 7-8-9               | 129.3                           | 129.3    | 129.5   | 130.1   | 126.7   | 128.1           | 128.3    | 129.2   | 128.4   | 126.1   |
| 8-9-10              | 117.6                           | 117.2    | 117.5   | 116.9   | 118.7   | 116.9           | 116.9    | 115.8   | 117     | 118.2   |
| 9-10-11             | 126.6                           | 126.6    | 126.9   | 127.1   | 124     | 125.1           | 125      | 126.6   | 125.4   | 123.3   |
| 10-11-12            | 128.8                           | 129.7    | 128.7   | 129.2   | 127.5   | 127.9           | 128.4    | 127.5   | 128.6   | 127     |
| 11-12-13            | 131.3                           | 132.1    | 131.4   | 131.8   | 129.7   | 129.3           | 129.7    | 129.8   | 130.4   | 128.8   |
| 12-13-14            | 116.9                           | 116.7    | 116.9   | 116.9   | 117.3   | 117.3           | 117.3    | 117.7   | 117     | 116.6   |
| 13-14-15            | 127.3                           | 127.5    | 127.6   | 127.5   | 126.3   | 125             | 124.9    | 125     | 125.5   | 125.6   |
| 14-15-N             | 119.6                           | 119.3    | 119.5   | 119.5   | 120.3   | 123.9           | 124      | 123.7   | 124     | 121.2   |
| 15-N-C              | 116.3                           | 116.5    | 115.8   | 115.8   | 118.8   | 124.6           | 123.8    | 125     | 123.7   | 124.3   |
| Dihedral Angles (°) |                                 |          |         |         |         |                 |          |         |         |         |
| 1-6-7-8             | 133.9                           | 134      | 135.7   | 134.9   | 142.6   | 143.7           | 143      | 142.5   | 145.5   | 148.7   |
| 5-6-7-8             | -48.8                           | -49.3    | -47.4   | -48.4   | -42.4   | -40.6           | -41.8    | -41.6   | -39.7   | -37     |
| 6-7-8-9             | 172.7                           | 173.8    | 173     | 173     | 178     | 179.8           | 179.4    | 178.6   | 179.4   | -179    |
| 7-8-9-10            | 179.5                           | 179.1    | 178.2   | 178.9   | 174.2   | 171.1           | 172.7    | 169     | 172.2   | 168.1   |
| 8-9-10-11           | 168.7                           | 170.9    | 168.4   | 168.9   | 170.9   | 171             | 171.4    | 171.2   | 171     | 171.2   |
| 9-10-11-12          | 170.4                           | 171.2    | 171.8   | 172.8   | 166.1   | 173.5           | 174.2    | 175.3   | 174.1   | 172.8   |
| 10-11-12-13         | -12.8                           | -11      | -13.8   | -13.4   | -14.4   | -23.1           | -22.4    | -22.5   | -23.2   | -22.5   |
| 11-12-13-14         | 169.8                           | 172.2    | 171     | 172.8   | 171     | 173.3           | 174      | 171.9   | 175.8   | 176.2   |
| 12-13-14-15         | 178.2                           | 178      | 178.2   | 178     | 175.4   | 178             | 178.1    | 179.9   | 175.9   | 174     |
| 13-14-15-N          | 173.2                           | 174.1    | 173.3   | 173.9   | 174.4   | 176.5           | 177.3    | 175.8   | 178.1   | 177.7   |
| 14-15-N-C           | 179.6                           | 179.1    | 179.9   | 179.2   | 178.1   | 178.5           | 177      | 177.6   | 177.4   | 179.4   |

15-N-C-C                    97.1      92.9      95.5      95.1      95.5                    93.6      92.5      95.4      89.6      88.6

b3lyp-me and b3lyp-ee bond lengths of Conformation C are as follows in the order given in the table:

b3lyp-me: 1.545/1.355/1.475/1.352/1.452/1.365/1.437/1.361/1.457/1.364/1.453/1.285/1.484/-

b3lyp-ee: 1.544/1.355/1.475/1.353/1.453/1.368/1.434/1.365/1.453/1.371/1.445/1.290/1.480/-

|                     | E122Q with PSBR |          |         |         |         | E122Q with SBR and protonated Glu113 |          |         |         |         |
|---------------------|-----------------|----------|---------|---------|---------|--------------------------------------|----------|---------|---------|---------|
|                     | b3lyp-me        | b3lyp-ee | blyp-me | blyp-ee | dftb-me | b3lyp-me                             | b3lyp-ee | blyp-me | blyp-ee | dftb-me |
| Bond Lengths (Å)    |                 |          |         |         |         |                                      |          |         |         |         |
| 1-6                 | 1.548           | 1.546    | 1.561   | 1.56    | 1.53    | 1.545                                | 1.547    | 1.558   | 1.56    | 1.528   |
| 5-6                 | 1.369           | 1.359    | 1.385   | 1.375   | 1.376   | 1.356                                | 1.357    | 1.371   | 1.372   | 1.363   |
| 6-7                 | 1.448           | 1.468    | 1.45    | 1.466   | 1.44    | 1.473                                | 1.475    | 1.475   | 1.477   | 1.46    |
| 7-8                 | 1.371           | 1.359    | 1.386   | 1.376   | 1.378   | 1.353                                | 1.335    | 1.368   | 1.37    | 1.362   |
| 8-9                 | 1.427           | 1.445    | 1.43    | 1.443   | 1.424   | 1.45                                 | 1.451    | 1.45    | 1.451   | 1.445   |
| 9-10                | 1.396           | 1.377    | 1.409   | 1.396   | 1.402   | 1.368                                | 1.37     | 1.385   | 1.388   | 1.375   |
| 10-11               | 1.403           | 1.423    | 1.408   | 1.422   | 1.402   | 1.436                                | 1.435    | 1.435   | 1.433   | 1.433   |
| 11-12               | 1.395           | 1.377    | 1.406   | 1.394   | 1.397   | 1.363                                | 1.366    | 1.38    | 1.383   | 1.365   |
| 12-13               | 1.407           | 1.428    | 1.415   | 1.431   | 1.407   | 1.456                                | 1.453    | 1.456   | 1.453   | 1.449   |
| 13-14               | 1.416           | 1.396    | 1.426   | 1.411   | 1.419   | 1.366                                | 1.372    | 1.384   | 1.389   | 1.372   |
| 14-15               | 1.38            | 1.398    | 1.389   | 1.403   | 1.388   | 1.456                                | 1.443    | 1.457   | 1.445   | 1.455   |
| 15-N                | 1.336           | 1.322    | 1.349   | 1.337   | 1.336   | 1.286                                | 1.292    | 1.302   | 1.308   | 1.28    |
| N-C(Leu296)         | 1.466           | 1.469    | 1.473   | 1.476   | 1.479   | 1.485                                | 1.482    | 1.495   | 1.491   | 1.497   |
| N...O(Glu113)       | 2.811           | 2.73     | 2.808   | 2.733   | 2.817   | 2.842                                | 2.678    | 2.821   | 2.676   | 2.866   |
| Bond Angles (°)     |                 |          |         |         |         |                                      |          |         |         |         |
| 1-6-7               | 117.2           | 116.9    | 117.4   | 116.8   | 118.4   | 116.5                                | 116.7    | 116.6   | 116.8   | 117     |
| 5-6-7               | 121.7           | 121.8    | 121.9   | 122.1   | 121.5   | 121.6                                | 121.6    | 121.7   | 121.7   | 121.7   |
| 6-7-8               | 124.8           | 123.4    | 124.7   | 124.2   | 122.9   | 122.8                                | 122.6    | 122.8   | 122.6   | 122.9   |
| 7-8-9               | 127.5           | 128.2    | 128.1   | 128.5   | 126.5   | 129.5                                | 129.8    | 130     | 130.1   | 126.5   |
| 8-9-10              | 117.5           | 117.6    | 117.1   | 117.5   | 118     | 117.2                                | 116.9    | 116.9   | 116.7   | 119.2   |
| 9-10-11             | 125             | 124.8    | 125.5   | 125     | 123.6   | 125.5                                | 125.6    | 125.9   | 126.1   | 122.5   |
| 10-11-12            | 129.3           | 130.3    | 128.5   | 129.6   | 127     | 130.3                                | 130.4    | 130     | 130     | 129     |
| 11-12-13            | 130.8           | 130.9    | 130.6   | 130.7   | 128.9   | 132.8                                | 132.2    | 132.6   | 132.1   | 131.33  |
| 12-13-14            | 117.3           | 116.5    | 117.4   | 116.8   | 117.5   | 116.4                                | 116.9    | 116.7   | 117.1   | 116.2   |
| 13-14-15            | 123.7           | 123.9    | 123.7   | 123.7   | 123.7   | 126.9                                | 126.6    | 126.8   | 126.7   | 126.1   |
| 14-15-N             | 125.3           | 123.8    | 125.3   | 124.1   | 122.8   | 120.9                                | 121.5    | 121.3   | 121.5   | 121.6   |
| 15-N-C              | 124.4           | 123.2    | 124.3   | 122.9   | 124.2   | 116                                  | 116.3    | 115.4   | 115.9   | 118.1   |
| Dihedral Angles (°) |                 |          |         |         |         |                                      |          |         |         |         |
| 1-6-7-8             | 143.8           | 137.3    | 145.2   | 141.2   | 147.9   | 133.2                                | 133.1    | 134.8   | 134.5   | 143.2   |
| 5-6-7-8             | -40.8           | -45.9    | -39.4   | -42.9   | -37.8   | -48.8                                | -48.5    | -47.1   | -47.3   | -41.7   |
| 6-7-8-9             | 178.7           | 178      | 179.1   | 178.9   | 179.2   | 178.1                                | 177.6    | 178.7   | 177.6   | 179     |
| 7-8-9-10            | 171.1           | 177.3    | 170.9   | 175.1   | 168.6   | 176.5                                | 177.1    | 174.2   | 175.4   | 172.2   |
| 8-9-10-11           | 170.4           | 170.2    | 169.7   | 170.6   | 168.1   | 172.3                                | 171.3    | 172.4   | 171     | 172.5   |
| 9-10-11-12          | 175.3           | 174.7    | 174.8   | 174.7   | 176.1   | 171.7                                | 173.7    | 172.1   | 175.1   | 166     |
| 10-11-12-13         | -22.6           | -17.8    | -24.7   | -20.3   | -24.9   | -12.2                                | -14.3    | -13.9   | -16.1   | -12.8   |
| 11-12-13-14         | 174.6           | 174.2    | 174.5   | 174.3   | 175.9   | 176.3                                | 174.9    | 176.9   | 175.8   | 174.9   |
| 12-13-14-15         | -179.9          | 180      | -179.1  | -179.3  | 179.6   | -179.9                               | 176.9    | 179.8   | 176.7   | 179.4   |

|            |       |       |       |       |       |       |       |       |       |       |
|------------|-------|-------|-------|-------|-------|-------|-------|-------|-------|-------|
| 13-14-15-N | 170.9 | 171.7 | 170.5 | 171.8 | 171.4 | 165.4 | 171.1 | 166.4 | 171.8 | 164.1 |
| 14-15-N-C  | 176.3 | 175.3 | 176.9 | 174.9 | 178.7 | 176.3 | 176.5 | 175.8 | 176.4 | 176.1 |
| 15-N-C-C   | 94.5  | 91    | 96.7  | 91.1  | 94.3  | 94.1  | 93.4  | 93.7  | 93.3  | 94.5  |

b3lyp-me and b3lyp-ee bond lengths of Conformation C for PSBR are as follows in the order given in the table:

b3lyp-me: 1.548/1.368/1.452/1.370/1.427/1.395/1.403/1.393/1.407/1.414/1.379/1.335/1.465/2.804

b3lyp-ee: 1.548/1.362/1.465/1.361/1.443/1.380/1.419/1.378/1.426/1.397/1.395/1.323/1.468/2.739

|                     | E122Q with SBR and deprotonated Glu113 |          |         |         |         | E181Q (Conform. A) |          | E181Q (Conform. B) |          |
|---------------------|----------------------------------------|----------|---------|---------|---------|--------------------|----------|--------------------|----------|
|                     | b3lyp-me                               | b3lyp-ee | blyp-me | blyp-ee | dffb-me | b3lyp-me           | b3lyp-ee | b3lyp-me           | b3lyp-ee |
| Bond Lengths (Å)    |                                        |          |         |         |         |                    |          |                    |          |
| 1-6                 | 1.545                                  | 1.546    | 1.559   | 1.56    | 1.529   | 1.547              | 1.545    | 1.548              | 1.545    |
| 5-6                 | 1.357                                  | 1.357    | 1.372   | 1.371   | 1.363   | 1.368              | 1.358    | 1.368              | 1.358    |
| 6-7                 | 1.476                                  | 1.48     | 1.478   | 1.483   | 1.463   | 1.45               | 1.468    | 1.451              | 1.468    |
| 7-8                 | 1.355                                  | 1.356    | 1.371   | 1.371   | 1.363   | 1.37               | 1.36     | 1.37               | 1.359    |
| 8-9                 | 1.453                                  | 1.452    | 1.453   | 1.455   | 1.447   | 1.427              | 1.445    | 1.427              | 1.445    |
| 9-10                | 1.368                                  | 1.368    | 1.386   | 1.385   | 1.377   | 1.394              | 1.379    | 1.394              | 1.378    |
| 10-11               | 1.443                                  | 1.441    | 1.442   | 1.439   | 1.436   | 1.403              | 1.421    | 1.403              | 1.421    |
| 11-12               | 1.362                                  | 1.362    | 1.38    | 1.38    | 1.367   | 1.393              | 1.378    | 1.393              | 1.378    |
| 12-13               | 1.456                                  | 1.457    | 1.455   | 1.457   | 1.449   | 1.407              | 1.427    | 1.407              | 1.428    |
| 13-14               | 1.369                                  | 1.365    | 1.387   | 1.382   | 1.376   | 1.415              | 1.397    | 1.415              | 1.396    |
| 14-15               | 1.456                                  | 1.456    | 1.457   | 1.455   | 1.456   | 1.38               | 1.396    | 1.38               | 1.397    |
| 15-N                | 1.282                                  | 1.281    | 1.297   | 1.297   | 1.277   | 1.336              | 1.323    | 1.336              | 1.322    |
| N-C(Leu296)         | 1.478                                  | 1.479    | 1.487   | 1.488   | 1.49    | 1.467              | 1.468    | 1.466              | 1.469    |
| N...O(Glu113)       | 3.334                                  | 3.794    | 3.378   | 3.93    | 3.396   | 2.825              | 2.738    | 2.821              | 2.745    |
| Bond Angles (°)     |                                        |          |         |         |         |                    |          |                    |          |
| 1-6-7               | 118.5                                  | 118.4    | 118.3   | 117.7   | 118.9   |                    |          |                    |          |
| 5-6-7               | 120.8                                  | 120.9    | 121.1   | 121.6   | 121     |                    |          |                    |          |
| 6-7-8               | 122                                    | 121.4    | 122.6   | 122.6   | 121.9   |                    |          |                    |          |
| 7-8-9               | 129.3                                  | 129.9    | 129.3   | 129.6   | 126.8   |                    |          |                    |          |
| 8-9-10              | 117.8                                  | 117.3    | 117.9   | 117.6   | 118.8   |                    |          |                    |          |
| 9-10-11             | 126.4                                  | 126.9    | 126.6   | 126.9   | 124.3   |                    |          |                    |          |
| 10-11-12            | 130.2                                  | 129.6    | 130.3   | 130.2   | 129.1   |                    |          |                    |          |
| 11-12-13            | 132.3                                  | 132.2    | 132.6   | 133.1   | 131.1   |                    |          |                    |          |
| 12-13-14            | 117.9                                  | 116.7    | 117.8   | 116     | 118.2   |                    |          |                    |          |
| 13-14-15            | 124.7                                  | 126.3    | 124.9   | 127.4   | 123.9   |                    |          |                    |          |
| 14-15-N             | 121.4                                  | 119.3    | 121.4   | 118.8   | 122     |                    |          |                    |          |
| 15-N-C              | 116.7                                  | 116.9    | 116     | 116.6   | 119     |                    |          |                    |          |
| Dihedral Angles (°) |                                        |          |         |         |         |                    |          |                    |          |
| 1-6-7-8             | 135.2                                  | 132.4    | 138     | 134.7   | 142.7   |                    |          |                    |          |
| 5-6-7-8             | -47.9                                  | -49.5    | -45.9   | -47.6   | -42.5   |                    |          |                    |          |
| 6-7-8-9             | 172.7                                  | 173.7    | 172.9   | 175.8   | 175.6   |                    |          |                    |          |
| 7-8-9-10            | 179.9                                  | -179.2   | 179.4   | 179     | 173.6   |                    |          |                    |          |
| 8-9-10-11           | 169                                    | 168.8    | 168.7   | 169.7   | 170.2   |                    |          |                    |          |
| 9-10-11-12          | 168.7                                  | 170.6    | 170.4   | 172.2   | 168.3   |                    |          |                    |          |
| 10-11-12-13         | -12.6                                  | -13      | -13.5   | -12.7   | -13.6   |                    |          |                    |          |

|             |        |       |       |       |       |
|-------------|--------|-------|-------|-------|-------|
| 11-12-13-14 | 172.8  | 173   | 175   | 177   | 173.6 |
| 12-13-14-15 | -179.6 | 178.2 | 180   | 176.4 | 178.8 |
| 13-14-15-N  | 168.5  | 170.7 | 169.2 | 172.1 | 166.9 |
| 14-15-N-C   | 179.1  | 179.3 | 179.3 | 179.4 | 178.4 |
| 15-N-C-C    | 98.1   | 98.7  | 95.8  | 92.7  | 98    |

| Bond Lengths<br>(Å) | G90D with PSBR   |              |                    |              | H211C with PSBR |              | D83N with PSBR |              |
|---------------------|------------------|--------------|--------------------|--------------|-----------------|--------------|----------------|--------------|
|                     | protonated Asp90 |              | deprotonated Asp90 |              | b3lyp-<br>me    | b3lyp-<br>ee | b3lyp-<br>me   | b3lyp-<br>ee |
|                     | b3lyp-<br>me     | b3lyp-<br>ee | b3lyp-<br>me       | b3lyp-<br>ee |                 |              |                |              |
| 1-6                 | 1.548            | 1.548        | 1.55               | 1.547        | 1.548           | 1.545        | 1.547          | 1.545        |
| 5-6                 | 1.369            | 1.359        | 1.368              | 1.357        | 1.368           | 1.358        | 1.369          | 1.358        |
| 6-7                 | 1.452            | 1.466        | 1.452              | 1.471        | 1.452           | 1.468        | 1.449          | 1.468        |
| 7-8                 | 1.37             | 1.359        | 1.37               | 1.357        | 1.37            | 1.359        | 1.371          | 1.359        |
| 8-9                 | 1.428            | 1.444        | 1.428              | 1.45         | 1.427           | 1.444        | 1.426          | 1.445        |
| 9-10                | 1.395            | 1.377        | 1.395              | 1.374        | 1.394           | 1.379        | 1.396          | 1.378        |
| 10-11               | 1.404            | 1.42         | 1.405              | 1.431        | 1.403           | 1.42         | 1.402          | 1.42         |
| 11-12               | 1.394            | 1.376        | 1.396              | 1.373        | 1.392           | 1.377        | 1.395          | 1.378        |
| 12-13               | 1.407            | 1.429        | 1.408              | 1.437        | 1.407           | 1.426        | 1.407          | 1.427        |
| 13-14               | 1.415            | 1.394        | 1.416              | 1.388        | 1.414           | 1.396        | 1.417          | 1.397        |
| 14-15               | 1.38             | 1.394        | 1.381              | 1.406        | 1.379           | 1.395        | 1.38           | 1.396        |
| 15-N                | 1.336            | 1.325        | 1.336              | 1.314        | 1.335           | 1.323        | 1.336          | 1.323        |
| N-C(Leu296)         | 1.467            | 1.468        | 1.467              | 1.47         | 1.465           | 1.467        | 1.466          | 1.467        |
| N...O(Glu113)       | 2.844            | 2.794        | 2.863              | 2.767        | 2.8             | 2.732        | 2.812          | 2.735        |

| Bond Lengths<br>(Å) | A292S with PSBR |              |                |              |                |              | W265Y with PSBR |              |
|---------------------|-----------------|--------------|----------------|--------------|----------------|--------------|-----------------|--------------|
|                     | Conformation A  |              | Conformation B |              | Conformation C |              | b3lyp-<br>me    | b3lyp-<br>ee |
|                     | b3lyp-<br>me    | b3lyp-<br>ee | b3lyp-<br>me   | b3lyp-<br>ee | b3lyp-<br>me   | b3lyp-<br>ee |                 |              |
| 1-6                 | 1.548           | 1.545        | 1.547          | 1.546        | 1.548          | 1.546        | 1.547           | 1.545        |
| 5-6                 | 1.369           | 1.358        | 1.369          | 1.359        | 1.368          | 1.359        | 1.367           | 1.358        |
| 6-7                 | 1.451           | 1.468        | 1.451          | 1.468        | 1.451          | 1.468        | 1.448           | 1.465        |
| 7-8                 | 1.37            | 1.359        | 1.37           | 1.36         | 1.37           | 1.36         | 1.37            | 1.358        |
| 8-9                 | 1.427           | 1.444        | 1.427          | 1.444        | 1.428          | 1.445        | 1.427           | 1.444        |
| 9-10                | 1.394           | 1.379        | 1.394          | 1.38         | 1.395          | 1.379        | 1.394           | 1.377        |
| 10-11               | 1.403           | 1.42         | 1.403          | 1.419        | 1.404          | 1.421        | 1.404           | 1.422        |
| 11-12               | 1.392           | 1.378        | 1.393          | 1.379        | 1.394          | 1.378        | 1.393           | 1.376        |
| 12-13               | 1.407           | 1.426        | 1.407          | 1.425        | 1.408          | 1.427        | 1.406           | 1.428        |
| 13-14               | 1.415           | 1.397        | 1.415          | 1.398        | 1.414          | 1.397        | 1.414           | 1.395        |
| 14-15               | 1.379           | 1.395        | 1.379          | 1.396        | 1.38           | 1.396        | 1.379           | 1.397        |
| 15-N                | 1.335           | 1.324        | 1.335          | 1.323        | 1.335          | 1.323        | 1.335           | 1.321        |

|               |       |       |       |       |       |       |       |       |
|---------------|-------|-------|-------|-------|-------|-------|-------|-------|
| N-C(Leu296)   | 1.465 | 1.467 | 1.465 | 1.468 | 1.465 | 1.468 | 1.465 | 1.467 |
| N...O(Glu113) | 2.806 | 2.737 | 2.797 | 2.728 | 2.806 | 2.732 | 2.809 | 2.736 |

| Bond Lengths<br>(Å) | A269T with PSBR |              |                |              |                |              |                |              |
|---------------------|-----------------|--------------|----------------|--------------|----------------|--------------|----------------|--------------|
|                     | Conformation A  |              | Conformation B |              | Conformation C |              | Conformation D |              |
|                     | b3lyp-<br>me    | b3lyp-<br>ee | b3lyp-<br>me   | b3lyp-<br>ee | b3lyp-<br>me   | b3lyp-<br>ee | b3lyp-<br>me   | b3lyp-<br>ee |
| 1-6                 | 1.544           | 1.543        | 1.548          | 1.545        | 1.545          | 1.543        | 1.547          | 1.544        |
| 5-6                 | 1.365           | 1.357        | 1.367          | 1.358        | 1.366          | 1.358        | 1.366          | 1.357        |
| 6-7                 | 1.452           | 1.467        | 1.449          | 1.467        | 1.451          | 1.467        | 1.452          | 1.466        |
| 7-8                 | 1.368           | 1.358        | 1.368          | 1.359        | 1.368          | 1.359        | 1.369          | 1.359        |
| 8-9                 | 1.427           | 1.443        | 1.427          | 1.446        | 1.426          | 1.442        | 1.428          | 1.444        |
| 9-10                | 1.393           | 1.378        | 1.393          | 1.378        | 1.393          | 1.379        | 1.393          | 1.379        |
| 10-11               | 1.403           | 1.421        | 1.403          | 1.422        | 1.403          | 1.419        | 1.403          | 1.421        |
| 11-12               | 1.391           | 1.377        | 1.392          | 1.376        | 1.391          | 1.377        | 1.392          | 1.378        |
| 12-13               | 1.407           | 1.426        | 1.407          | 1.427        | 1.407          | 1.425        | 1.407          | 1.427        |
| 13-14               | 1.413           | 1.396        | 1.415          | 1.396        | 1.413          | 1.397        | 1.414          | 1.397        |
| 14-15               | 1.379           | 1.396        | 1.38           | 1.396        | 1.379          | 1.394        | 1.38           | 1.397        |
| 15-N                | 1.335           | 1.323        | 1.336          | 1.322        | 1.335          | 1.324        | 1.335          | 1.323        |
| N-C(Leu296)         | 1.465           | 1.467        | 1.466          | 1.467        | 1.464          | 1.467        | 1.465          | 1.469        |
| N...O(Glu113)       | 2.807           | 2.736        | 2.814          | 2.733        | 2.807          | 2.732        | 2.81           | 2.738        |

| E113D               |              |              |
|---------------------|--------------|--------------|
| Bond Lengths<br>(Å) | b3lyp-<br>me | b3lyp-<br>ee |
| 1-6                 | 1.548        | 1.546        |
| 5-6                 | 1.370        | 1.359        |
| 6-7                 | 1.447        | 1.465        |
| 7-8                 | 1.372        | 1.360        |
| 8-9                 | 1.424        | 1.442        |
| 9-10                | 1.396        | 1.379        |
| 10-11               | 1.401        | 1.419        |
| 11-12               | 1.395        | 1.378        |
| 12-13               | 1.406        | 1.426        |
| 13-14               | 1.419        | 1.398        |
| 14-15               | 1.379        | 1.395        |
| 15-N                | 1.337        | 1.323        |
| N-C(Leu296)         | 1.468        | 1.469        |
| N...O(Asp113)       | 2.883        | 2.814        |

## 5. Average BLA Values

| Structure                                 | Average BLA (Å) of<br>B3LYP:MM-EE<br>geometry | B3LYP(EE//EE) First Vertical<br>Excitation Energy (nm) |
|-------------------------------------------|-----------------------------------------------|--------------------------------------------------------|
| WT                                        | 0.064                                         | 503                                                    |
| WT with SBR and protonated<br>Glu113      | 0.099                                         | 429                                                    |
| WT with SBR and protonated<br>Glu113      | 0.109                                         | 380                                                    |
| E113Q with SBR (Conformation A)           | 0.100                                         | 425                                                    |
| E113Q with SBR (Conformation B)           | 0.106                                         | 409                                                    |
| E113Q with SBR (Conformation C)           | 0.102                                         | 422                                                    |
| E113Q with PSBR                           | 0.035                                         | 530                                                    |
| E113D with PSBR                           | 0.063                                         | 499                                                    |
| E122Q with PSBR (Conformation A)          | 0.067                                         | 492                                                    |
| E122Q with PSBR (Conformation B)          | 0.063                                         | 514                                                    |
| E122Q with SBR and protonated<br>Glu113   | 0.103                                         | 418                                                    |
| E122Q with SBR and deprotonated<br>Glu113 | 0.109                                         | 379                                                    |
| G90D with PSBR and protonated<br>Asp90    | 0.066                                         | 502                                                    |
| G90D with PSBR and deprotonated<br>Asp90  | 0.079                                         | 475                                                    |
| W265Y with PSBR                           | 0.067                                         | 497                                                    |
| A292S with PSBR (Conformation A)          | 0.065                                         | 501                                                    |
| A292S with PSBR (Conformation B)          | 0.064                                         | 507                                                    |
| A292S with PSBR (Conformation C)          | 0.065                                         | 500                                                    |
| A269T with PSBR (Conformation A)          | 0.066                                         | 503                                                    |
| A269T with PSBR (Conformation B)          | 0.067                                         | 498                                                    |
| A269T with PSBR (Conformation C)          | 0.064                                         | 506                                                    |
| A269T with PSBR (Conformation D)          | 0.066                                         | 506                                                    |
| H211C with PSBR                           | 0.065                                         | 501                                                    |
| D83N with PSBR                            | 0.066                                         | 502                                                    |
| E181Q (Conformation A)                    | 0.066                                         | 499                                                    |
| E181Q (Conformation A)                    | 0.067                                         | 500                                                    |
